# Supplementary material
Source: PubMed Central journal article supplement (PMC4115781)
Supplement: Supp_Data.pdf [file Supp_Data.pdf]

**Supplementary Data****Chromatin properties of cis-regulatory modules in ES cells probed by manipulation of transcription factors**

Alexei A. Sharov, Akira Nishiyama, Yong Qian, Dawood Dudekula, Dan L. Longo, David Schlessinger, and Minoru S.H. Ko

**Supplementary Table S1. ChIP-seq data on binding of transcription factors and chromatin modifications in mouse ES cells**

| Transcription factor, chromatin mark | Cells                     | Peaks used | Tags used | Reference               |
|--------------------------------------|---------------------------|------------|-----------|-------------------------|
| Pou5f1                               | ES cells                  | 1          | 0         | (Marson et al. 2008)    |
| Nanog                                | ES cells                  | 1          | 0         | (Marson et al. 2008)    |
| Sox2                                 | ES cells                  | 1          | 0         | (Marson et al. 2008)    |
| Klf4                                 | ES cells                  | 1          | 0         | (Chen et al. 2008)      |
| Tcfcp2l1                             | ES cells                  | 1          | 0         | (Chen et al. 2008)      |
| Stat3                                | ES cells                  | 1          | 0         | (Chen et al. 2008)      |
| P300                                 | ES cells                  | 1          | 0         | (Chen et al. 2008)      |
| Smad1                                | ES cells                  | 1          | 0         | (Chen et al. 2008)      |
| Tcf3                                 | ES cells                  | 1          | 0         | (Marson et al. 2008)    |
| Cdx2                                 | ES cells,<br>Cdx2 induced | 1          | 0         | (Nishiyama et al. 2009) |
| Myod1                                | Myoblasts                 | 1          | 0         | (Cao et al. 2010)       |
| Sfp1                                 | Macrophages               | 1          | 0         | (Lefterova et al. 2010) |
| P300                                 | ES cells                  | 0          | 1         | (Creyghton et al. 2010) |
| P300                                 | ES cells                  | 0          | 1         | (Schnetz et al. 2010)   |
| Chd7                                 | ES cells                  | 0          | 1         | (Schnetz et al. 2010)   |
| Med1                                 | ES cells                  | 0          | 1         | (Kagey et al. 2010)     |
| Med12                                | ES cells                  | 0          | 1         | (Kagey et al. 2010)     |
| Nipbl                                | ES cells                  | 0          | 1         | (Kagey et al. 2010)     |
| Smc1                                 | ES cells                  | 0          | 1         | (Kagey et al. 2010)     |
| Smc3                                 | ES cells                  | 0          | 1         | (Kagey et al. 2010)     |
| Rad21                                | ES cells                  | 0          | 1         | (Nitzsche et al. 2011)  |
| Suz12                                | ES cells                  | 0          | 1         | (Chen et al. 2008)      |
| Suz12                                | ES cells                  | 0          | 1         | (Ku et al. 2008)        |
| Suz12                                | ES cells                  | 0          | 1         | (Young et al. 2011)     |
| Ezh2                                 | ES cells                  | 0          | 1         | (Ku et al. 2008)        |
| Ring1b                               | ES cells                  | 0          | 1         | (Ku et al. 2008)        |
| Mtf2                                 | ES cells                  | 0          | 1         | (Li et al. 2010)        |
| Jarid2                               | ES cells                  | 0          | 1         | (Li et al. 2010)        |
| Setdb1                               | ES cells                  | 0          | 1         | (Bilodeau et al. 2009)  |

|            |          |     |     |                                    |
|------------|----------|-----|-----|------------------------------------|
| Ctcf       | ES cells | 0   | 1   | (Handoko et al. 2011)              |
| Brg1       | ES cells | 0   | 1   | (Ho et al. 2011)                   |
| Mbd3       | ES cells | 0   | 1   | (Yildirim et al. 2011)             |
| H3K27ac    | ES cells | 0   | 1   | (Creyghton et al. 2010)            |
| H3K27me3   | ES cells | 0   | 1   | (Ho et al. 2011)                   |
| H3K27me3   | ES cells | 0   | 1   | (Mikkelsen et al. 2007)            |
| H3K27me3   | ES cells | 0   | 1   | (Young et al. 2011)                |
| H3K36me3   | ES cells | 0   | 1   | (Mikkelsen et al. 2007)            |
| H3K4me1    | ES cells | 0   | 1   | (Meissner et al. 2008)             |
| H3K4me2    | ES cells | 0   | 1   | (Meissner et al. 2008)             |
| H3K4me3    | ES cells | 0   | 1   | (Mikkelsen et al. 2007)            |
| H3K4me3    | ES cells | 0   | 1   | (Marks et al. 2009)                |
| H3K9ac     | ES cells | 0   | 1   | (Hezroni et al. 2011)              |
| H3K9me3    | ES cells | 0   | 1   | (Bilodeau et al. 2009)<br>(Ab8898) |
| H3K9me3    | ES cells | 0   | 1   | (Mikkelsen et al. 2007)            |
| H3K9me3    | ES cells | 0   | 1   | (Yuan et al. 2009)                 |
| H4K20me3   | ES cells | 0   | 1   | (Mikkelsen et al. 2007)            |
| Lamin B1 * | ES cells | n/a | n/a | (Kim et al. 2011)                  |

\*) Lamin B1 data was obtained using DAM-ID method with hybridization on a full-genome tiling arrays

**Supplementary Table S2. Correlation matrix between sets of z-values (to evaluate the association between the change of expression of target genes and presence of factors at transcription factor binding sites) obtained with 7 types of analysis.**

Method 1: Pearson correlation; uses average abundance of a factor in all TF binding sites for each target gene. Method 2: Pearson correlation; abundance of a factor is estimated at the TF binding site closest to the TSS of target gene. Method 3: Pearson correlation; uses the highest abundance of factor among TF binding sites associated with target gene. Method 4: Spearman correlation; uses the highest abundance of factor among TF binding sites associated with target gene. Methods 5-7: Multivariate regression (gene expression change is regressed against factor abundance at TF binding sites and distance from binding sites to TSS of target gene); factor abundance is estimated as in methods 1-3, respectively.

|          | Method 1 | Method 2 | Method 3 | Method 4 | Method 5 | Method 6 | Method 7 |
|----------|----------|----------|----------|----------|----------|----------|----------|
| Method 1 | 1.000    | 0.982    | 0.976    | 0.981    | 0.959    | 0.953    | 0.940    |
| Method 2 | 0.982    | 1.000    | 0.957    | 0.960    | 0.934    | 0.930    | 0.912    |
| Method 3 | 0.976    | 0.957    | 1.000    | 0.970    | 0.922    | 0.972    | 0.906    |
| Method 4 | 0.981    | 0.960    | 0.970    | 1.000    | 0.931    | 0.937    | 0.948    |
| Method 5 | 0.959    | 0.934    | 0.922    | 0.931    | 1.000    | 0.963    | 0.979    |
| Method 6 | 0.953    | 0.930    | 0.972    | 0.937    | 0.963    | 1.000    | 0.939    |
| Method 7 | 0.940    | 0.912    | 0.906    | 0.948    | 0.979    | 0.939    | 1.000    |

## Supplementary Table S3. Association between the response of target genes to manipulations of transcription factors (TFs) and presence of chromatin modifications and cofactors at TF binding sites

### Z-values for the effect of cofactors and chromatin modifications estimated using 7 methods of analysis

Method 1: Pearson correlation; uses average abundance of a factor in all TF binding sites for each target gene  
 Method 2: Pearson correlation; abundance of a factor is estimated at the TF binding site closest to the TSS of target gene  
 Method 3: Pearson correlation; uses the highest abundance of factor among TF binding sites associated with target gene  
 Method 4: Spearman correlation; uses the highest abundance of factor among TF binding sites associated with target gene  
 Methods 5-7: Multivariate regression (gene expression change is regressed against factor abundance at TF binding sites and distance from binding sites to TSS of target gene); factor abundance is estimated as in methods 1-3, respectively.

Data transformation:  $\log(\text{abs}(x_i))$ , where  $x_i$  is the logratio of expression change of target gene  $i$ ;  $\log(q_i + 0.5)$ , where  $q_i$  is the enrichment ratio of a chromatin feature or cofactor at TF binding sites near gene  $i$ ;  $\exp(-cdi)$  where  $c=0.0001$  and  $di$  is distance from TF binding site(s) to TSS.

| TFs      | Manipulation of TFs | Up/Down regulation of targets | Method | H3K4me3 | H3K4me2 | H3K4me1 | H3K9me3 | H3K27me3 | H3K36me3 | H4K20me3 | H3K27ac | H3K9ac | P300  | Chd7  | Smc1  | Smc3  | Med1  | Med12 | Nipbl | Rad21 | Brg1  | Ctcf  | Setdb1 | Suz12 | Ring1b | Ezh2  | Jarid2 | Mtf2  | Mdb3  | No Lamin B1 |
|----------|---------------------|-------------------------------|--------|---------|---------|---------|---------|----------|----------|----------|---------|--------|-------|-------|-------|-------|-------|-------|-------|-------|-------|-------|--------|-------|--------|-------|--------|-------|-------|-------------|
| Pou5f1   | Induction           | -1                            | 1      | -2.48   | -0.25   | 1.49    | 0.24    | 1.98     | -2.26    | 3.3      | -0.28   | -0.12  | 4.1   | 3.29  | 1.07  | -0.54 | 2.39  | 2.47  | 0.57  | 3.07  | 1.16  | -0.8  | -0.74  | 1.08  | 0.61   | 0.18  | -1.13  | 0.76  | -2.92 | 1.74        |
| Sox2     | Induction           | -1                            | 1      | -5.04   | -3.37   | -0.64   | -2.18   | 3.04     | -3.21    | 1.18     | -3.14   | -4.39  | 1.95  | 1.43  | -0.51 | -1.59 | 0.02  | 0.28  | -0.99 | 0.52  | 0.67  | -1.6  | -0.93  | -0.16 | 0.11   | 1.25  | -0.8   | 0.07  | -1.81 | -1.64       |
| Nanog    | Induction           | -1                            | 1      | -3.32   | -2.88   | -2.44   | 0.98    | 2.68     | -3.89    | -0.14    | -4.18   | -2.75  | -1.84 | -0.6  | -1.54 | -2.71 | -2.21 | -1.6  | -1.71 | -1.21 | -0.27 | -2.66 | -2.4   | 0.69  | -0.82  | 1.39  | 1.91   | 2.1   | -1.26 | -2.52       |
| Tcf3     | Induction           | -1                            | 1      | 1.33    | 1.57    | -1.08   | 1.43    | 0.85     | -2.9     | 1.46     | 1.46    | 1.79   | 4.1   | 4.72  | 2     | 0.26  | 3.39  | 3.72  | 3.07  | 3.09  | 4.62  | 1.19  | 1.52   | 0.37  | -0.66  | -0.23 | 0.17   | 0.92  | -1.76 | 1.51        |
| Klf4     | Induction           | -1                            | 1      | -5.41   | -0.83   | 3.33    | -0.56   | 8.49     | 1.61     | 1.32     | -7.84   | -10    | 0.98  | 0.51  | 0.11  | -2.16 | -4.43 | -3.25 | -4.69 | 4.75  | -0.96 | -1.94 | -4.14  | 6.31  | 2.96   | 6.19  | -0     | 5.05  | -0.98 | -1.44       |
| Tcfcp2l1 | Induction           | -1                            | 1      | -2.32   | -2.07   | -0.47   | 0.18    | 2.28     | -3.06    | -1.96    | -3.31   | -2.72  | 0.19  | 0.49  | -0.94 | -1.36 | -2.03 | -1.07 | -0.88 | 1.1   | -0.44 | -1.33 | -1.27  | 2.19  | 3.07   | 1.45  | 0.4    | 3.64  | -0.99 | -1.09       |
| Cdx2     | Induction           | -1                            | 1      | 1.29    | -0.64   | 2       | 0.67    | 1.86     | 0.49     | 1.49     | 1.67    | 0.7    | 3.26  | 0.93  | 1.76  | 0.85  | 2.25  | 0.7   | 2.28  | 1.44  | -0.12 | 1.21  | 0.77   | 0.72  | 0.28   | 1.06  | 0.78   | 0.59  | 0.41  | 0.94        |
| Myod1    | Induction           | -1                            | 1      | -6.62   | -4.7    | 0.24    | -3.85   | 6.19     | 0.2      | 1.44     | -7.27   | -6.37  | -4.55 | -3.67 | -4.35 | -4.03 | -5.83 | -6.18 | -6.39 | 3.12  | -4.95 | -3.17 | -5.76  | 2.15  | 1.39   | 0.81  | -4.01  | 4.42  | -3.87 | -3.49       |
| Sfp1     | Induction           | -1                            | 1      | -6.63   | -4.6    | -0.96   | -4.87   | 2.84     | 1.15     | 1.93     | -6.64   | -6.71  | -4.4  | -4.29 | -2.62 | -2.98 | -5.38 | -5.69 | -5.97 | 3.67  | -4.68 | -1.5  | -6.17  | -0.01 | 0.87   | -0.77 | -5.79  | 2.38  | -4.53 | -4.32       |
| Pou5f1   | Knockdown           | -1                            | 1      | -2.2    | 1.54    | 2.16    | 0.03    | 3.05     | -2.75    | 3.26     | -0.26   | -0.09  | 5.87  | 5.45  | 0.57  | -2.26 | 3.13  | 3.29  | 1.17  | 2.02  | 3.42  | -2.69 | -0.74  | 0.92  | 1.92   | 1.11  | -1.53  | -0.77 | -2.23 | 0.23        |
| Sox2     | Knockdown           | -1                            | 1      | 0.94    | 2.37    | 0.79    | 0.78    | 3.62     | -2.2     | 2.34     | 2.64    | 2.41   | 7.34  | 4.3   | 3.94  | 1.99  | 5.28  | 5.44  | 4.09  | 4.48  | 4.81  | 1.49  | 3      | 1.37  | -0.23  | 2.56  | 0.94   | -1.69 | 0.07  | 2.41        |
| Nanog    | Knockdown           | -1                            | 1      | 3.56    | 2.4     | 1.3     | 1.51    | 3.72     | -1.73    | 1.48     | 3.73    | 1.71   | 5.35  | 2.41  | 4.15  | 3.56  | 4.89  | 4.44  | 4.14  | 2.33  | 2.11  | 2.69  | 3.97   | 1.59  | 0.19   | 2.69  | 2.46   | -0.13 | 1.96  | 4.27        |
| Pou5f1   | Induction           | 1                             | 1      | -4.07   | -3.49   | -0.1    | -0.44   | 7.32     | -3.38    | -0.29    | -7.37   | -6.22  | -2.21 | -0.47 | -2.04 | -1.66 | -4.41 | -3.96 | -3.98 | 1.36  | -4.16 | -1.81 | -3.47  | 4.57  | 2      | 4.19  | -0.47  | 3.84  | -2.25 | -3.44       |
| Sox2     | Induction           | 1                             | 1      | -3.75   | -1.15   | 3.13    | -0.9    | 6.71     | -2.52    | 1.19     | -3.62   | -4.49  | 0.73  | -1.1  | -0.66 | -1.52 | -2.67 | -1.67 | -1.93 | 1.88  | -0.66 | -2.16 | -2.03  | 3.29  | 0.6    | 3.47  | 0.05   | 1.05  | -2.73 | -0.93       |
| Nanog    | Induction           | 1                             | 1      | -0.73   | -1.31   | -1.32   | 0.9     | 1.74     | -3.44    | 0.93     | -1      | -1.83  | -0.13 | -1.59 | -0.71 | -0.18 | -1.08 | -1.33 | -0.55 | 0.83  | -0.61 | -0.51 | -1.35  | 0.1   | -0.49  | 1.21  | 0.56   | 0.61  | -0.81 | 0.27        |
| Tcf3     | Induction           | 1                             | 1      | -0.69   | -1.95   | 1.35    | 0.76    | 3.97     | -1.22    | 2.06     | -1.67   | -2.78  | -0.55 | -2.14 | 0.23  | -0    | -0.7  | -1.3  | -0.27 | 0.71  | -2.48 | -2.12 | 0.6    | 0.7   | 0.59   | 2.15  | 0.73   | -0.22 | 1.22  | 0.01        |
| Klf4     | Induction           | 1                             | 1      | -6.82   | -2.16   | 4.18    | -0.15   | 8.93     | -1.66    | 0.38     | -8.19   | -7.33  | -0.17 | -1.41 | -0.8  | -2.49 | -4.84 | -4.87 | -5.36 | 2.8   | -2.85 | -1.5  | -5.01  | 5.8   | 5.64   | 5.32  | -0.31  | 3.57  | -1.59 | 1.08        |
| Tcfcp2l1 | Induction           | 1                             | 1      | -1.3    | 0.74    | 1.02    | 1       | 5.72     | -4.17    | -0.44    | -1.91   | -3.17  | 1.4   | -1.85 | 0.62  | -0.3  | 0.34  | 0.22  | 0.16  | -2.18 | -1.19 | -1.64 | -0.12  | 0.97  | -0.25  | 2.37  | 0.24   | -0.15 | 1.67  |             |
| Cdx2     | Induction           | 1                             | 1      | 0.38    | -1.21   | -0.41   | 3.18    | 9.83     | -5.07    | 1.7      | -0.1    | -2.19  | 1.93  | 1.26  | 0.97  | 0.27  | 1.34  | 0.4   | 1.22  | -1.22 | -0.22 | -1.88 | 2.28   | 4.83  | 2.51   | 6.56  | 2.65   | -0.96 | -0.28 | 0.47        |
| Myod1    | Induction           | 1                             | 1      | -5.43   | -1.38   | 2.77    | -1.42   | 8.6      | -1.93    | 1.07     | -5.69   | -6.64  | -2.29 | -2.37 | -1.84 | -3.01 | -4.01 | -3.76 | -4.33 | 0.91  | -3.61 | -2.36 | -3.91  | 4.48  | 3.17   | 3.97  | -2     | 1.94  | -2.3  | -1.74       |
| Sfp1     | Induction           | 1                             | 1      | -5.18   | -1.64   | 2.82    | -1.87   | 8.79     | -1.87    | -0.47    | -5.42   | -5.98  | -2.32 | -0.79 | -2.59 | -2.15 | -4.68 | -4.62 | -4.9  | 1.38  | -4.13 | -1.24 | -5.15  | 3.17  | 1.39   | 3.83  | -1.97  | 2.65  | -2.65 | -1.44       |
| Pou5f1   | Knockdown           | 1                             | 1      | -3.21   | -1.6    | 3.45    | -0.26   | 4.16     | -1.63    | 1.35     | -3.4    | -5.24  | 1.66  | 2.05  | -0.48 | -1.46 | -2.07 | -1.35 | -1.77 | 1.1   | 0.16  | -0.77 | -1.53  | 2.42  | 0.22   | 0.92  | -1.36  | 1.46  | -1.36 | -1.81       |
| Sox2     | Knockdown           | 1                             | 1      | -1.57   | -2.09   | -0.12   | 1.13    | 6.19     | -2.78    | -0.37    | -3.09   | -3.11  | -1.06 | -0.62 | 1.12  | 0.66  | -1.83 | -1.96 | -1.3  | 1.37  | -2.27 | -0.39 | -0.73  | 3.31  | 2.01   | 5.06  | 1.55   | 1.63  | -0    | -0.14       |
| Nanog    | Knockdown           | 1                             | 1      | -3.26   | -3.03   | -2.11   | 1.4     | 7.03     | -4.06    | -1.09    | -6.31   | -4.75  | -0.71 | 0.49  | -1.55 | -2.72 | -2.94 | -2.06 | -2.69 | -0.59 | 0.1   | -4.73 | -2.08  | 3.96  | 1.7    | 4.3   | 2.14   | 2.48  | -1.83 | -1.71       |
| Pou5f1   | Induction           | -1                            | 2      | -2.84   | 0.21    | 1.79    | -0.62   | 2.24     | -2.96    | 2.67     | -0.6    | -0.75  | 3.76  | 2.62  | 0.21  | -1.43 | 1.74  | 1.77  | 0.01  | 2.72  | -0.22 | -1.59 | -1.7   | 1.45  | 0.16   | 0.3   | -1.69  | 0.51  | -2.43 | 1.35        |
| Sox2     | Induction           | -1                            | 2      | -5.43   | -4      | -0.48   | -2.64   | 2.81     | -3.15    | 0.62     | -3.64   | -5.34  | 1.77  | 0.6   | -0.69 | -1.68 | -0.29 | 0.03  | -1.13 | 0.9   | 0.58  | -1.12 | -1.26  | 0.18  | 0.49   | 1.63  | -0.74  | 0.89  | -1.62 | -1.5        |
| Nanog    | Induction           | -1                            | 2      | -2.65   | -2.66   | -3.41   | 1.79    | 2.95     | -3.9     | -0.07    | -3.87   | -1.95  | -1.37 | -0.52 | -1.34 | -2.52 | -2.19 | -1.43 | -1.82 | -0.49 | -0.73 | -2.09 | -1.94  | 1.89  | -0.27  | 2.17  | 2.55   | 3.12  | -0.86 | -2.71       |
| Tcf3     | Induction           | -1                            | 2      | 1.48    | 1.84    | -0.96   | 1.49    | 1.56     | -2.77    | 1.11     | 2.01    | 2.45   | 4.95  | 5.11  | 2.37  | 0.31  | 4.06  | 4.5   | 3.65  | 3.2   | 5.02  | 1.13  | 2.23   | 0.86  | -0.71  | 0.62  | 0.97   | 0.9   | -0.86 | 1.89        |
| Klf4     | Induction           | -1                            | 2      | -6.17   | -0.37   | 4.31    | -0.71   | 9.14     | 2.42     | 1.38     | -8.5    | -10.2  | 0.38  | 0.31  | -0.43 | -3.03 | -5    | -4.02 | -5.77 | 4.59  | -1.44 | -2.27 | -4.79  | 6.5   | 3.63   | 6.19  | -0.22  | 5.06  | -1.74 | -1.39       |
| Tcfcp2l1 | Induction           | -1                            | 2      | -2.36   | -1.54   | 0.81    | 0.81    | 3.3      | -1.55    | -0.88    | -3.53   | -2.49  | -0.51 | 0.76  | -1.02 | -1.22 | -2.13 | -1.41 | -1.24 | 0.78  | -0.49 | -1.36 | -1.72  | 2.91  | 3.97   | 2.43  | 1.22   | 5.69  | -0.78 | -0.19       |
| Cdx2     | Induction           | -1                            | 2      | 1.38    | -0.48   | 2.03    | 0.82    | 1.71     | 0.8      | 1.4      | 1.73    | 1.72   | 3.3   | 1.73  | 1.62  | 0.55  | 1.99  | 0.58  | 2.61  | 2.13  | -0.15 | 0.79  | 0.65   | 1.38  | 0.13   | 2.06  | 0.65   | -0.1  | 1.21  | 1.31        |
| Myod1    | Induction           | -1                            | 2      | -6.08   | -3.97   | 0.61    | -3.2    | 5.92     | 0.59     | 1.66     | -6.65   | -6.34  | -4.11 | -2.74 | -3.61 | -3.2  | -5.34 | -5.56 | -5.81 | 3.23  | -4.2  | -2.82 | -4.54  | 2.33  | 1.78   | 1.6   | -3.47  | 3.81  | -4.15 | -3.05       |
| Sfp1     | Induction           | -1                            | 2      | -7.37   | -5.15   | -0.37   | -5.47   | 2.57     | 1.92     | 2.76     | -7.15   | -6.9   | -5.09 | -4.55 | -3.37 | -3.47 | -6.02 | -6.21 | -6.65 | 3.43  | -5.32 | -2.18 | -6.93  | 0.13  | 1      | -1.16 | -6.28  | 2.71  | -4.77 | -4.58       |
| Pou5f1   | Knockdown           | -1                            | 2      | -2.82   | 1.8     | 2.91    | -0.23   | 3.8      | -2.59    | 2.81     | -0.44   | -0.33  | 6.54  | 5.17  | 0.58  | -2.26 | 3.38  | 3.81  | 1.29  | 2.27  | 3.34  | -2.71 | -0.51  | 1.8   | 1.47   | 1.56  | -1.49  | -0.05 | -1.56 | 0.8         |
| Sox2     | Knockdown           | -1                            | 2      | 0.98    | 2.73    | -0.12   | 1.76    | 5.1      | -2.26    | 1.32     | 2.96    | 2.45   | 7.61  | 3.93  | 4.2   | 2     | 5.68  | 6.15  | 4.33  | 4.05  | 4.57  | 1.83  | 3.33   | 2.21  | 0.07   | 3.66  | 1.31   | -1.17 | 1.44  | 2.89        |

|          |           |    |   |       |       |       |       |       |       |       |       |       |       |       |       |       |       |       |       |       |       |       |       |       |       |       |       |       |       |       |
|----------|-----------|----|---|-------|-------|-------|-------|-------|-------|-------|-------|-------|-------|-------|-------|-------|-------|-------|-------|-------|-------|-------|-------|-------|-------|-------|-------|-------|-------|-------|
| Nanog    | Knockdown | -1 | 2 | 3.36  | 2.59  | 0.48  | 2.14  | 4.86  | -2.56 | 1.3   | 3.83  | 1.91  | 5.61  | 3.04  | 4.62  | 3.63  | 5.37  | 4.76  | 4.4   | 2.37  | 2.78  | 3.3   | 4.01  | 2.41  | -0.2  | 3.21  | 2.79  | -0.06 | 2.09  | 4.26  |
| Pou5f1   | Induction | 1  | 2 | -4.21 | -2.61 | 0.56  | -1.11 | 7.41  | -3.63 | -0.4  | -7.53 | -5.73 | -2.18 | 0.14  | -1.72 | -2.04 | -4.5  | -3.99 | -4.03 | 1.59  | -3.87 | -2    | -3.38 | 4.98  | 3.61  | 4.88  | -0.39 | 4.13  | -1.99 | -2.99 |
| Sox2     | Induction | 1  | 2 | -2.91 | -0.5  | 2.92  | 0.13  | 7.46  | -3.3  | 0.4   | -3.54 | -4.21 | 0.81  | -0.8  | -0.1  | -0.58 | -1.95 | -1.39 | -1.53 | 1.71  | -1.04 | -1.09 | -1.27 | 4.04  | 1.86  | 4.52  | 1.41  | 2.69  | -1.92 | -0.81 |
| Nanog    | Induction | 1  | 2 | -0.51 | -0.37 | -0.54 | 1.08  | 1.2   | -3.72 | 1.14  | -0.23 | -2.18 | 0.76  | -0.33 | 0.28  | 0.24  | -0.38 | -0.51 | 0.17  | 1.86  | 0.02  | 0.47  | -0.94 | 0.11  | -0.32 | 1.28  | 0.82  | -0.23 | -0.14 | 0.59  |
| Tcf3     | Induction | 1  | 2 | -0.96 | -2.38 | 1.21  | 0.49  | 3.61  | -1.44 | 1.49  | -1.99 | -2.81 | -0.58 | -1.83 | 0.38  | 0.42  | -0.72 | -1.32 | -0.28 | 0.98  | -2.39 | -1.67 | 0.61  | 0.6   | 0.08  | 2.05  | 1.04  | 0.15  | 0.81  | 0.55  |
| Klf4     | Induction | 1  | 2 | -6.87 | -1.86 | 4     | -0.66 | 9.33  | -1.24 | 0.4   | -8.48 | -8.34 | -0.86 | -1.73 | -1.35 | -2.46 | -5.73 | -5.69 | -6.14 | 2.38  | -3.27 | -1.2  | -5.57 | 6     | 6     | 5.65  | -0.07 | 3.68  | -2.06 | 0.55  |
| Tcfcp2l1 | Induction | 1  | 2 | -0.98 | 1.34  | 2     | 0.76  | 5.45  | -2.54 | -0.61 | -1.72 | -3.02 | 1.24  | -0.82 | 1.05  | 0.06  | 0.05  | 0.36  | 0.27  | -1.43 | -0.91 | -0.85 | -0.3  | 2.33  | 0.65  | 2.32  | 2.66  | 0.23  | 0.67  | 2.33  |
| Cdx2     | Induction | 1  | 2 | 0.1   | -1.59 | -1.14 | 2.27  | 9.24  | -4.56 | 1.68  | -0.19 | -2.31 | 1.47  | 0.43  | 0.17  | -0.64 | 0.93  | -0.15 | 0.64  | -1.56 | -0.97 | -2.62 | 1.96  | 4.05  | 1.84  | 5.73  | 2.6   | -0.16 | -0.6  | 0.63  |
| Myod1    | Induction | 1  | 2 | -4.24 | -0.28 | 3.29  | 0.43  | 8.72  | 0.22  | 0.8   | -5.42 | -6.34 | -2.2  | -2.53 | -1.39 | -2.28 | -3.65 | -3.17 | -3.98 | 1.51  | -2.74 | -2.12 | -2.79 | 5.78  | 4.83  | 5.65  | -0.03 | 3.84  | -2.06 | -0.66 |
| Sfpi1    | Induction | 1  | 2 | -4.1  | -0.24 | 3.73  | -1.22 | 8.59  | -0.91 | 0.13  | -4.48 | -5.25 | -1.51 | 0.1   | -1.75 | -1.42 | -4.04 | -4.1  | -4.13 | 0.91  | -3.06 | -0.81 | -4.01 | 3.68  | 1.43  | 4.81  | -0.51 | 3     | -2.05 | -0.42 |
| Pou5f1   | Knockdown | 1  | 2 | -2.95 | -1.67 | 2.77  | -0.03 | 4.23  | -1.43 | 1.03  | -3.8  | -5.6  | 1.02  | 1.55  | -0.37 | -1.06 | -2.43 | -1.81 | -2.3  | 1.14  | -0.09 | -0.4  | -1.87 | 2.58  | 0.88  | 1.68  | -0.54 | 1.34  | -1.27 | -1.99 |
| Sox2     | Knockdown | 1  | 2 | -2.43 | -2.72 | -0.12 | 0.58  | 5.79  | -2.79 | -0.69 | -3.77 | -3.64 | -0.85 | -0.68 | 1.1   | 0.84  | -1.88 | -1.91 | -1.29 | 0.98  | -2.1  | -0.42 | -0.74 | 2.55  | 1.55  | 4.13  | 1.1   | 2.24  | -0.93 | 0.11  |
| Nanog    | Knockdown | 1  | 2 | -2.3  | -2.49 | -2.51 | 1.74  | 7.03  | -3.39 | -1.19 | -5.74 | -4.02 | -0.08 | 1.18  | -0.52 | -1.97 | -2.23 | -1.3  | -2.15 | 0.52  | 0.45  | -3.69 | -1.09 | 5.1   | 1.76  | 4.93  | 2.99  | 3.51  | -1.01 | -1.51 |
| Pou5f1   | Induction | -1 | 3 | -1.78 | 0.21  | 1.89  | 0.55  | 2.42  | -1.46 | 3.35  | 0.11  | 0.13  | 4.28  | 3.58  | 1.45  | -0.25 | 3.14  | 3.11  | 1.26  | 2.72  | 1.32  | -0.42 | -0.33 | 1.86  | 1.35  | 0.52  | -0.46 | 0.93  | -1.69 | 2.25  |
| Sox2     | Induction | -1 | 3 | -5.25 | -3.63 | -0.73 | -2.67 | 2.72  | -3.12 | 0.65  | -3.05 | -4.2  | 1.35  | 1.54  | -1.06 | -2.24 | -0.27 | -0.04 | -1.16 | 0.01  | 0.59  | -1.78 | -1.19 | -0.29 | 0.32  | 0.71  | -0.82 | -0.26 | -1.5  | -1.27 |
| Nanog    | Induction | -1 | 3 | -2.18 | -2.37 | -1.32 | 1.31  | 2.85  | -2.84 | 0.26  | -3.44 | -1.68 | -1.1  | -0.42 | -0.72 | -2.3  | -1.49 | -1.21 | -1.12 | -0.72 | -0.03 | -1.9  | -1.67 | 1.58  | -0.1  | 2.11  | 2.66  | 2.46  | -0.07 | -1.57 |
| Tcf3     | Induction | -1 | 3 | 1.78  | 2.08  | -0.24 | 2.12  | 2.05  | -1.94 | 2.07  | 2.11  | 2.63  | 4.81  | 5.78  | 2.76  | 1.31  | 3.95  | 4.21  | 3.66  | 3.54  | 5.53  | 2.23  | 2.57  | 1.61  | 0.54  | 1.56  | 1.38  | 2.37  | -0.51 | 3.12  |
| Klf4     | Induction | -1 | 3 | -5.92 | -1.14 | 2.32  | -0.61 | 7.93  | 1.22  | 0.68  | -7.88 | -9.75 | 1.28  | 0.85  | 0.57  | -1.83 | -4.45 | -3.14 | -4.72 | 4.07  | -0.78 | -1.37 | -4.6  | 5.87  | 2.64  | 5.93  | 0.05  | 4.13  | -1.35 | -1.44 |
| Tcfcp2l1 | Induction | -1 | 3 | -2.58 | -1.63 | -0.7  | 0.03  | 2.69  | -3.49 | -1.77 | -3.78 | -3.09 | -0.39 | 0.65  | -0.83 | -1.24 | -2.21 | -1.4  | -1.24 | 0.44  | -0.32 | -1.28 | -1.23 | 2.65  | 3.39  | 2.52  | 0.99  | 3.66  | -0.81 | -0.65 |
| Cdx2     | Induction | -1 | 3 | 1.38  | -0.73 | 1.82  | 0.57  | 1.74  | 0.31  | 1.27  | 1.55  | 0.23  | 2.67  | 0.98  | 1.72  | 0.8   | 1.89  | 0.66  | 2.24  | 1.08  | -0.49 | 1.2   | 0.47  | 0.31  | 0.47  | 1.17  | 1.47  | -0.19 | -0.21 | 0.74  |
| Myod1    | Induction | -1 | 3 | -6.46 | -3.75 | 0.62  | -3.1  | 5.87  | 0.05  | 2.08  | -6.75 | -6.12 | -3.76 | -2.7  | -3.39 | -2.93 | -5.38 | -5.62 | -6.03 | 3.2   | -3.95 | -2.25 | -5.06 | 2.88  | 1.92  | 1.78  | -3.03 | 4.54  | -2.67 | -2.45 |
| Sfpi1    | Induction | -1 | 3 | -6.69 | -4.17 | -0.09 | -4.45 | 2.79  | 0.93  | 2     | -6.55 | -6.59 | -4.48 | -3.72 | -2.06 | -2.34 | -5.42 | -5.47 | -6    | 3.73  | -4.42 | -0.95 | -6.09 | 0.33  | 1.2   | -0.27 | -5.44 | 2.37  | -4.34 | -4.18 |
| Pou5f1   | Knockdown | -1 | 3 | -1.63 | 2.7   | 2.71  | 1.47  | 4.13  | -1.51 | 4.3   | 0.55  | 0.62  | 6.73  | 6.33  | 1.75  | -1.13 | 3.99  | 4.39  | 2.4   | 2.39  | 4.13  | -1.17 | 0.49  | 1.98  | 2.69  | 2.35  | -0.91 | 0.48  | -0.79 | 1.48  |
| Sox2     | Knockdown | -1 | 3 | 2.07  | 4.12  | 2.38  | 2.86  | 5.49  | -0.35 | 3.98  | 3.87  | 3.93  | 8.58  | 6.31  | 5.34  | 3.23  | 6.66  | 6.88  | 5.42  | 5.2   | 6.08  | 2.81  | 4.13  | 2.93  | 1.81  | 4.39  | 2.3   | 0.27  | 1.63  | 4.26  |
| Nanog    | Knockdown | -1 | 3 | 4.52  | 3.9   | 2.69  | 2.64  | 5.39  | -0.95 | 2.8   | 4.99  | 3.14  | 6.9   | 3.7   | 5.37  | 4.34  | 6.52  | 5.92  | 5.69  | 3.22  | 3.68  | 3.84  | 4.63  | 3.62  | 2.61  | 4.81  | 3.57  | 1.82  | 2.96  | 5.68  |
| Pou5f1   | Induction | 1  | 3 | -4.13 | -3.09 | 0.2   | -0.42 | 7.23  | -2.96 | 0.33  | -6.84 | -5.76 | -1.77 | -0.12 | -1.64 | -1.67 | -4.19 | -3.46 | -3.67 | 1.21  | -3.32 | -1.73 | -3.39 | 4.98  | 2.98  | 4.46  | -0.22 | 4.01  | -1.74 | -2.98 |
| Sox2     | Induction | 1  | 3 | -2.74 | -0.02 | 3.55  | 0.51  | 7.53  | -1.45 | 1.84  | -2.46 | -3.26 | 1.8   | 0.15  | 0.48  | -0.3  | -1.54 | -0.47 | -0.83 | 2.72  | 1.43  | -0.41 | -0.9  | 4.31  | 2.4   | 4.87  | 1.61  | 2.35  | -1.14 | 0.76  |
| Nanog    | Induction | 1  | 3 | -1.28 | -1.53 | -1.44 | 0.15  | 0.88  | -4.03 | 0.41  | -1.18 | -1.83 | -0.61 | -1.52 | -0.78 | -0.39 | -1.09 | -1.33 | -0.82 | 0.34  | -0.77 | -0.83 | -1.57 | -0.1  | -0.6  | 0.71  | 0.12  | 0.38  | -0.84 | 0.3   |
| Tcf3     | Induction | 1  | 3 | -0.47 | -1.64 | 1.51  | 0.94  | 3.99  | -0.99 | 2.14  | -1.52 | -2.35 | -0.29 | -1.7  | 0.35  | 0.07  | -0.58 | -1    | -0.08 | 0.88  | -2.11 | -1.64 | 0.71  | 0.74  | 0.47  | 2.22  | 1.06  | 0.2   | 1.32  | 0.18  |
| Klf4     | Induction | 1  | 3 | -6.99 | -1.65 | 3.59  | 0.32  | 9.16  | -1.98 | 0.67  | -7.89 | -6.8  | -0.1  | -1.06 | -0.7  | -1.77 | -4.59 | -4.75 | -5.15 | 2.84  | -2.54 | -0.68 | -4.88 | 6.35  | 5.99  | 5.65  | 0.14  | 3.38  | -1.31 | 0.95  |
| Tcfcp2l1 | Induction | 1  | 3 | -1.11 | 0.74  | 0.62  | 1.49  | 4.96  | -3.54 | -0.15 | -1.49 | -2.72 | 1.78  | -1.13 | 0.76  | -0.2  | 0.77  | 0.69  | 0.58  | -1.81 | -0.88 | -1.06 | -0.02 | 1.18  | 0.09  | 2.51  | 2.63  | 0.32  | 0.54  | 1.41  |
| Cdx2     | Induction | 1  | 3 | 1.03  | -0.07 | 0.78  | 3.7   | 9.94  | -3.93 | 2.64  | 0.52  | -0.85 | 2.57  | 2.21  | 1.66  | 0.68  | 1.9   | 1.35  | 1.88  | -0    | 0.79  | -0.78 | 2.89  | 5.38  | 3.55  | 7.72  | 3.54  | 0.26  | 0.86  | 1.92  |
| Myod1    | Induction | 1  | 3 | -3.9  | 0.3   | 3.52  | 0.51  | 8.9   | -1.23 | 2.24  | -4.49 | -5.31 | -0.39 | -0.52 | 0.29  | -0.44 | -2.52 | -2.2  | -2.88 | 2.64  | -1.4  | -0.15 | -2.47 | 5.69  | 5.04  | 5.32  | 0.58  | 3.19  | -1.01 | 0.29  |
| Sfpi1    | Induction | 1  | 3 | -4.33 | -0.34 | 3.81  | -0.62 | 9.14  | -1.11 | 1.55  | -4.53 | -5.01 | -1.33 | 0.34  | -0.71 | -0.02 | -3.62 | -3.43 | -3.98 | 3.2   | -2.57 | 0.49  | -3.79 | 4.93  | 2.78  | 5.3   | -0.19 | 3.87  | -1.31 | 0.37  |
| Pou5f1   | Knockdown | 1  | 3 | -2.97 | -1.13 | 3.47  | 0.32  | 4.6   | -0.92 | 1.82  | -2.91 | -4.65 | 2.18  | 2.62  | 0.3   | -0.82 | -1.56 | -0.73 | -1.07 | 1.75  | 0.71  | 0.2   | -1.23 | 2.82  | 1.18  | 1.68  | -0.41 | 2.01  | -0.7  | -0.39 |
| Sox2     | Knockdown | 1  | 3 | -1.38 | -1.96 | -0.06 | 0.7   | 5.85  | -2.76 | -0.48 | -2.85 | -3.04 | -0.6  | -0.31 | 1.07  | 0.51  | -1.44 | -1.68 | -0.7  | 1.49  | -1.98 | -0.29 | -0.36 | 3.11  | 2.44  | 4.75  | 1.69  | 1.56  | -0.21 | 0.32  |
| Nanog    | Knockdown | 1  | 3 | -2.52 | -2.72 | -1.48 | 1.39  | 7.26  | -3.93 | -0.43 | -5.64 | -4.26 | -0.36 | 1.47  | -0.85 | -2.38 | -2.37 | -1.45 | -2.05 | -0.21 | 0.29  | -3.8  | -1.62 | 4.24  | 1.84  | 4.83  | 3.47  | 2.9   | -1.29 | -1.29 |
| Pou5f1   | Induction | -1 | 4 | -2.08 | -0.37 | 0.8   | 0.48  | 1.47  | -1.97 | 3.01  | -0.58 | -0.08 | 3.28  | 3.79  | 0.82  | -0.69 | 1.43  | 1.8   | 0.09  | 2.59  | 0.99  | -1.24 | -0.36 | 1.05  | 0.28  | 0.08  | -0.69 | -0.08 | -2.05 | 1.96  |
| Sox2     | Induction | -1 | 4 | -3.56 | -2.72 | -0.21 | -1.03 | 2.21  | -2.31 | 1.68  | -2.31 | -3.79 | 2.37  | 1.85  | 0.32  | -0.87 | 0.36  | 0.46  | -0.27 | 0.83  | 1.08  | -1.76 | -0.19 | 0.14  | 0.3   | 0.93  | -0.88 | -0.4  | -0.76 | -1.44 |
| Nanog    | Induction | -1 | 4 | -3.32 | -3.07 | -2.6  | 0.7   | 2.13  | -3.65 | -0.32 | -3.96 | -2.21 | -1.76 | -1.09 | -1.51 | -2.67 | -2.22 | -1.68 | -1.81 | -1.17 | -0.71 | -2.31 | -2.14 | 0.27  | -0.79 | 0.79  | 0.65  | 1.66  | -1.85 | -2.81 |
| Tcf3     | Induction | -1 | 4 | 1.49  | 1.74  | -1.88 | 1.81  | -0.36 | -1.9  | 1.89  | 1.44  | 1.59  | 3.96  | 4.86  | 1.96  | 0.51  | 3.45  | 3.86  | 3.27  | 3.52  | 4.88  | 2.18  | 1.27  | 0.03  | -0.84 | -0.62 | 0.8   | 1.36  | -1.51 | 1.2   |
| Klf4     | Induction | -1 | 4 | -5.17 | -0.03 | 2.67  | -0.36 | 7.36  | 1.97  | 1.04  | -7.63 | -9.05 | 0.03  | -0.05 | 0.86  | -1.48 | -4.47 | -3.02 | -4.06 | 4.15  | -0.63 | -1.9  | -3.63 | 5.1   | 1.84  | 4.89  | -0.62 | 3.56  | -0.61 | -0.54 |
| Tcfcp2l1 | Induction | -1 | 4 | -2.26 | -1.89 | -0.3  | 0.38  | 2.04  | -2.93 | -1.9  | -3.47 | -3.48 | 0.32  | -0.03 | -1.28 | -2    | -1.89 | -1.02 | -1.03 | 0.79  | -0.16 | -1.82 | -1.62 | 2.38  | 2.93  | 0.79  | -0.18 | 3.12  | -1.62 | -1.18 |
| Cdx2     | Induction | -1 | 4 | 0.98  | -0.49 | 2.26  | 0.42  | 2.96  | 1.03  | 1.08  | 1.97  | 1.05  | 3.16  | 0.79  | 2.16  | 1.24  | 2.24  | 0.29  | 2.13  | 1.81  | -0.46 | 1.94  | 0.55  | 1.19  | -0.08 | 1.48  | 1.76  | 0.48  | 0.65  | 0.57  |
| Myod1    | Induction | -1 | 4 | -6.51 | -4.86 | -0.31 | -3.89 | 7.26  | 0.75  | 1.34  | -7.25 | -6.48 | -5.04 | -4.23 | -5.38 | -5.66 | -6.15 | -6.32 | -6.64 | 2.39  | -5.2  | -4.62 | -6.37 | 1.78  | 1.64  | -0.03 | -4.8  | 4.33  | -4.37 | -3.79 |
| Sfpi1    | Induction | -1 | 4 | -5.68 | -3.93 | -1.05 | -4.05 | 3.82  | 2.08  | 1.75  | -5.89 | -     |       |       |       |       |       |       |       |       |       |       |       |       |       |       |       |       |       |       |

|          |           |    |   |       |       |       |       |      |       |       |       |       |       |       |       |       |       |       |       |       |       |       |       |       |       |       |       |       |       |       |
|----------|-----------|----|---|-------|-------|-------|-------|------|-------|-------|-------|-------|-------|-------|-------|-------|-------|-------|-------|-------|-------|-------|-------|-------|-------|-------|-------|-------|-------|-------|
| Cdx2     | Induction | 1  | 4 | 0.68  | -0.8  | -0.08 | 2.97  | 9.6  | -4.16 | 1.63  | 0.9   | -2.89 | 2.25  | 0.84  | 1.33  | 0.21  | 1.67  | 0.1   | 1.23  | -1.73 | -0.59 | -2.14 | 2.79  | 2.79  | 1.61  | 5.2   | 1.86  | -2.06 | -1.03 | 0.32  |
| Myod1    | Induction | 1  | 4 | -4.09 | -1.29 | 3.19  | -0.78 | 8.66 | -1.28 | 0.25  | -5.26 | -6.12 | -2.48 | -2.19 | -1.7  | -2.68 | -3.36 | -3.49 | -4    | 1.56  | -3.68 | -1.74 | -3.39 | 4.14  | 2.46  | 3.22  | -2.42 | 2.15  | -2.89 | -1.28 |
| Sfp1     | Induction | 1  | 4 | -4.06 | -1.31 | 3.28  | -1.95 | 8.11 | -0.97 | -0.21 | -4.38 | -5.01 | -2.02 | -0.94 | -2.14 | -1.95 | -3.82 | -3.87 | -4    | 1.3   | -3.97 | -0.7  | -4.62 | 2.31  | 1.05  | 2.55  | -2.07 | 1.86  | -2.01 | -0.67 |
| Pou5f1   | Knockdown | 1  | 4 | -1.64 | -1.4  | 2.73  | 0.34  | 5.64 | -0.8  | 1.72  | -2.71 | -4.16 | 1.92  | 2.51  | 0.45  | -0.48 | -1.45 | -0.9  | -1    | 2.3   | 0.41  | -0    | -1.38 | 2.64  | 0.43  | 1.1   | -0.51 | 1.24  | -0.87 | -1.33 |
| Sox2     | Knockdown | 1  | 4 | -0.75 | -1.72 | -0.56 | 1.69  | 6.34 | -2.33 | 0.08  | -2.91 | -2.89 | -0.4  | -0.49 | 1.3   | 0.78  | -1.55 | -1.85 | -0.95 | 0.97  | -2.16 | -0.91 | -0.73 | 3.1   | 2.3   | 4.84  | 1.61  | 1.06  | 0.23  | -0.33 |
| Nanog    | Knockdown | 1  | 4 | -3    | -3.3  | -3.03 | 1.69  | 6.04 | -4.16 | -0.95 | -5.81 | -4.37 | -0.63 | 0.54  | -1.49 | -2.99 | -2.49 | -1.84 | -2.74 | -1.01 | 0.14  | -5.37 | -1.99 | 2.53  | 1     | 3.34  | 0.59  | 1.72  | -2.19 | -2.46 |
| Pou5f1   | Induction | -1 | 5 | -2.62 | -0.13 | 1.43  | 0.34  | 2    | -2.29 | 3.28  | -0.13 | 0.04  | 4.21  | 3.31  | 1.23  | -0.45 | 2.69  | 2.72  | 0.75  | 3.04  | 1.22  | -0.72 | -0.63 | 1.11  | 0.62  | 0.24  | -1.05 | 0.71  | -2.92 | 1.92  |
| Sox2     | Induction | -1 | 5 | -4.88 | -3.08 | -0.85 | -1.91 | 3.23 | -3.17 | 1.04  | -2.82 | -4.11 | 2.1   | 1.54  | -0.19 | -1.32 | 0.45  | 0.64  | -0.6  | 0.47  | 0.85  | -1.32 | -0.53 | -0.03 | 0.21  | 1.54  | -0.33 | 0     | -1.52 | -1.33 |
| Nanog    | Induction | -1 | 5 | -3.9  | -3.28 | -2.6  | 0.89  | 2.46 | -3.91 | -0.02 | -4.36 | -2.9  | -2.03 | -0.81 | -1.8  | -2.96 | -2.45 | -1.83 | -1.92 | -1.32 | -0.34 | -2.88 | -2.64 | 0.43  | -1    | 1.13  | 1.61  | 2.01  | -1.52 | -2.87 |
| Tcf3     | Induction | -1 | 5 | -0.41 | 0.45  | -0.86 | 0.97  | 0.33 | -2.96 | 1.94  | 0.5   | 0.65  | 3.74  | 4.56  | 1.43  | -0.3  | 2.69  | 3.19  | 2.47  | 3.56  | 4.38  | 0.52  | 0.78  | -0.08 | -1.04 | -0.76 | -1.1  | 0.77  | -2.4  | 0.79  |
| Klf4     | Induction | -1 | 5 | -4.41 | -0.06 | 2.08  | 0.94  | 8.59 | 0.85  | 0.66  | -7.18 | -9.46 | 0.92  | 0.36  | 0.96  | -1.27 | -3.6  | -2.43 | -3.79 | 3.92  | -0.34 | -1.29 | -2.98 | 6.56  | 3.11  | 6.71  | 2.14  | 4.48  | 0.47  | -1.16 |
| Tcfcp2l1 | Induction | -1 | 5 | -0.56 | -0.98 | -0.79 | 2.09  | 3.94 | -3.57 | -2.77 | -2.45 | -2.02 | 0.64  | 0.84  | 0.1   | -0.46 | -1.13 | -0.23 | 0.2   | 0.55  | 0.21  | -0.54 | -0.01 | 3.83  | 4.07  | 3.04  | 2.76  | 4.02  | 0.49  | -0.32 |
| Cdx2     | Induction | -1 | 5 | 1.42  | -0.47 | 2.16  | 0.74  | 1.93 | 0.52  | 1.48  | 1.78  | 0.85  | 3.32  | 1     | 1.83  | 0.91  | 2.37  | 0.79  | 2.36  | 1.44  | -0.04 | 1.33  | 0.83  | 0.72  | 0.28  | 1.05  | 0.88  | 0.59  | 0.44  | 1.07  |
| Myod1    | Induction | -1 | 5 | -3.44 | -2.03 | 0.37  | -0.97 | 5.97 | -1.3  | -0.21 | -4.61 | -4    | -2.05 | -1.56 | -1.67 | -1.65 | -2.98 | -3.45 | -3.63 | 1.98  | -2.36 | -0.83 | -3.03 | 2.6   | 1.63  | 2.11  | -0.44 | 3.24  | -1.47 | -1.6  |
| Sfp1     | Induction | -1 | 5 | -3.44 | -1.48 | -0.56 | -2.13 | 1.78 | -0.04 | 0.96  | -3.73 | -3.86 | -1.77 | -1.61 | 0.16  | -0.67 | -2.27 | -2.73 | -3    | 3.16  | -1.74 | 0.55  | -3.44 | -0.03 | 0.69  | 0.34  | -2.85 | 1.15  | -2.38 | -2.21 |
| Pou5f1   | Knockdown | -1 | 5 | -3.05 | 1.36  | 2.3   | -0.16 | 2.97 | -2.74 | 3.41  | -0.59 | -0.39 | 5.82  | 5.4   | 3.37  | -2.57 | 3.03  | 3.19  | 0.97  | 2.14  | 3.34  | -3    | -1.09 | 0.84  | 1.87  | 0.99  | -2.06 | -0.68 | -2.6  | 0.02  |
| Sox2     | Knockdown | -1 | 5 | -1.06 | 1.35  | 1.18  | 0.13  | 3.47 | -2.3  | 2.77  | 1.37  | 1.1   | 6.96  | 3.95  | 3.26  | 1.4   | 4.31  | 4.58  | 3.15  | 4.83  | 4.43  | 0.71  | 1.99  | 1.22  | -0.43 | 2.11  | -0.37 | -1.42 | -0.81 | 1.38  |
| Nanog    | Knockdown | -1 | 5 | 1.74  | 0.87  | 0.88  | 0.73  | 3.43 | -2.08 | 1.58  | 2.33  | 0.17  | 4.55  | 1.74  | 3.12  | 2.7   | 3.76  | 3.37  | 3.05  | 2.6   | 1.43  | 1.89  | 2.83  | 1.08  | -0.27 | 2.13  | 1.13  | 0.29  | 1.01  | 3.36  |
| Pou5f1   | Induction | 1  | 5 | -3.75 | -3.12 | -0.45 | -0.03 | 7.7  | -3.58 | -0.57 | -7.22 | -6    | -2.07 | -0.39 | -1.62 | -1.22 | -4.08 | -3.63 | -3.63 | 1.19  | -4.01 | -1.37 | -3.07 | 4.87  | 2.14  | 4.72  | 0.32  | 3.7   | -1.81 | -3.13 |
| Sox2     | Induction | 1  | 5 | -4.17 | -1.21 | 3.15  | -0.92 | 6.74 | -2.52 | 1.21  | -3.76 | -4.7  | 0.73  | -1.11 | -0.67 | -1.54 | -2.73 | -1.71 | -1.97 | 1.89  | -0.67 | -2.2  | -2.09 | 3.31  | 0.59  | 3.39  | 0.03  | 1.06  | -2.79 | -0.96 |
| Nanog    | Induction | 1  | 5 | -1.07 | -1.59 | -1.4  | 0.74  | 1.59 | -3.48 | 1.05  | -1.22 | -2.09 | -0.25 | -1.62 | -0.88 | -0.31 | -1.31 | -1.53 | -0.71 | 0.85  | -0.67 | -0.62 | -1.53 | -0.05 | -0.53 | 1.04  | 0.3   | 0.57  | -1    | 0.1   |
| Tcf3     | Induction | 1  | 5 | 0.21  | -1.44 | 1.15  | 0.96  | 4.51 | -1.32 | 1.68  | -1.37 | -2.37 | -0.53 | -2.08 | 0.54  | 0.24  | -0.37 | -1.07 | -0.05 | 0.5   | -2.42 | -1.8  | 0.86  | 1.18  | 0.85  | 2.72  | 1.55  | -0    | 1.81  | 0.47  |
| Klf4     | Induction | 1  | 5 | -6.42 | -1.6  | 3.4   | 0.92  | 9.35 | -2.3  | -0.31 | -7.71 | -6.85 | -0.3  | -1.46 | -0.23 | -1.92 | -4.31 | -4.38 | -4.77 | 2.02  | -2.45 | -1.16 | -4.28 | 6.34  | 5.94  | 5.93  | 1.16  | 3.26  | -0.71 | 1.39  |
| Tcfcp2l1 | Induction | 1  | 5 | -3.19 | -0.3  | 1.15  | -0.01 | 5.31 | -3.92 | 0.03  | -2.97 | -4.1  | 0.99  | -2.21 | -0.2  | -1.07 | -0.52 | -0.54 | -0.69 | -1.66 | -1.7  | -2.11 | -1.18 | 0.54  | -0.49 | 1.94  | 1.05  | 0.46  | -1    | 1.07  |
| Cdx2     | Induction | 1  | 5 | -0.1  | -1.8  | -0.89 | 2.96  | 9.59 | -5.12 | 1.68  | -0.43 | -2.64 | 1.7   | 0.94  | 0.62  | -0.02 | 1.01  | 0     | 0.93  | 1.16  | -0.52 | -2.15 | 2.03  | 4.65  | 2.42  | 6.35  | 2.25  | -1.12 | -0.48 | 0.13  |
| Myod1    | Induction | 1  | 5 | -6.9  | -1.4  | 2.8   | -1.44 | 8.67 | -2.06 | 1.01  | -6.47 | -7.02 | -2.37 | -2.42 | -1.89 | -3.13 | -4.48 | -4.19 | -4.84 | 0.87  | -3.85 | -2.39 | -4.32 | 4.62  | 3.21  | 4.16  | -2.22 | 1.91  | -2.39 | -1.71 |
| Sfp1     | Induction | 1  | 5 | -6.1  | -1.6  | 2.91  | -1.84 | 8.78 | -1.96 | -0.58 | -6.03 | -6.44 | -2.32 | -0.64 | -2.61 | -2.1  | -5.1  | -5.05 | -5.34 | 1.31  | -4.35 | -1.14 | -5.61 | 3.19  | 1.38  | 3.95  | -1.99 | 2.59  | -2.68 | -1.35 |
| Pou5f1   | Knockdown | 1  | 5 | -1.51 | -0.57 | 2.67  | 0.65  | 4.62 | -1.97 | 0.76  | -2.34 | -4.25 | 1.97  | 2.13  | 0.53  | -0.51 | -0.93 | -0.31 | -0.67 | 0.59  | 0.64  | 0.22  | -0.31 | 2.95  | 0.44  | 1.7   | 0.3   | 1.03  | -0.24 | -0.93 |
| Sox2     | Knockdown | 1  | 5 | -0.74 | -1.63 | -0.33 | 1.46  | 6.54 | -2.8  | -0.58 | -2.68 | -2.65 | -1.02 | -0.55 | 1.53  | 1.08  | -1.4  | -1.61 | -0.9  | 1.25  | -2.15 | 0.06  | -0.28 | 3.63  | 2.12  | 5.58  | 2.35  | 1.48  | 0.41  | 0.22  |
| Nanog    | Knockdown | 1  | 5 | -3.49 | -3.17 | -2.11 | 1.39  | 7.2  | -4.07 | -1.07 | -6.4  | -4.83 | -0.73 | 0.48  | -1.62 | -2.79 | -3.02 | -2.11 | -2.76 | -0.59 | 0.09  | -4.85 | -2.13 | 4.01  | 1.69  | 4.4   | 2.2   | 2.48  | -1.89 | -1.79 |
| Pou5f1   | Induction | -1 | 6 | -3.36 | 0.26  | 1.82  | -0.62 | 2.26 | -2.97 | 2.69  | -0.63 | -0.78 | 3.84  | 2.64  | 0.25  | -1.48 | 1.93  | 1.92  | 0.05  | 2.73  | -0.21 | -1.6  | -1.8  | 1.47  | 0.17  | 0.33  | -1.83 | 0.5   | -2.54 | 1.42  |
| Sox2     | Induction | -1 | 6 | -5.1  | -3.57 | -0.73 | -2.27 | 3.13 | -3.13 | 0.35  | -3.17 | -4.96 | 2.04  | 0.82  | -0.23 | -1.27 | 0.33  | 0.56  | -0.57 | 0.8   | 0.92  | -0.79 | -0.69 | 0.4   | 0.58  | 2.08  | -0.08 | 0.78  | -1.16 | -1.06 |
| Nanog    | Induction | -1 | 6 | -3.68 | -3.39 | -3.64 | 1.52  | 2.53 | -3.88 | 0.12  | -4.25 | -2.27 | -1.66 | -0.9  | -1.81 | -2.99 | -2.66 | -1.86 | -2.26 | -0.66 | -0.95 | -2.4  | -2.37 | 1.47  | -0.55 | 1.71  | 2.05  | 2.98  | -1.3  | -3.26 |
| Tcf3     | Induction | -1 | 6 | -1.06 | 0.11  | -0.74 | 0.73  | 0.61 | -2.83 | 1.66  | 0.58  | 0.84  | 4.26  | 4.67  | 1.37  | -0.77 | 2.85  | 3.54  | 2.59  | 3.51  | 4.53  | 0.09  | 0.95  | -0.01 | -1.32 | -0.42 | -0.87 | 0.61  | -1.91 | 0.81  |
| Klf4     | Induction | -1 | 6 | -4.72 | 0.57  | 2.78  | 1.11  | 9.19 | 1.39  | 0.54  | -7.52 | -9.43 | 0.41  | 0.22  | 0.7   | -1.88 | -3.83 | -2.88 | -4.6  | 3.51  | -0.56 | -1.44 | -3.29 | 6.78  | 3.81  | 6.73  | 2.41  | 4.29  | 0.07  | -1.05 |
| Tcfcp2l1 | Induction | -1 | 6 | -0.56 | -0.23 | 0.44  | 2.89  | 4.9  | -2.23 | -1.73 | -2.49 | -1.69 | 0.18  | 1.4   | 0.19  | -0.17 | -1.05 | -0.31 | 0.01  | 0.2   | 0.41  | -0.55 | -0.38 | 4.63  | 5.18  | 4.25  | 3.91  | 5.97  | 0.86  | 0.71  |
| Cdx2     | Induction | -1 | 6 | 1.53  | -0.23 | 2.2   | 0.9   | 1.82 | 0.78  | 1.37  | 1.82  | 1.9   | 3.34  | 1.8   | 1.64  | 0.58  | 2.09  | 0.67  | 2.67  | 2.08  | -0.06 | 0.95  | 0.7   | 1.36  | 0.07  | 2.01  | 0.82  | -0.05 | 1.24  | 1.43  |
| Myod1    | Induction | -1 | 6 | -3.59 | -1.68 | 0.47  | -0.64 | 6.06 | -0.91 | 0.23  | -4.51 | -4.55 | -1.96 | -0.87 | -1.31 | -1.21 | -3.03 | -3.3  | -3.57 | 2.11  | -2    | -0.96 | -2.15 | 3.01  | 2.06  | 2.9   | -0.47 | 2.85  | -2.11 | -1.52 |
| Sfp1     | Induction | -1 | 6 | -4.35 | -2.04 | 0.02  | -2.62 | 1.98 | 0.52  | 1.86  | -4.29 | -4.11 | -2.46 | -1.92 | -0.61 | -1.16 | -2.98 | -3.3  | -3.78 | 2.89  | -2.42 | -0.15 | -4.22 | 0.52  | 0.96  | 0.34  | -3.32 | 1.54  | -2.5  | -2.47 |
| Pou5f1   | Knockdown | -1 | 6 | -4.92 | 1.22  | 3.34  | -0.83 | 3.54 | -2.47 | 3.14  | -1.42 | -1.21 | 6.3   | 5.02  | -0.05 | -3.04 | 2.89  | 3.38  | 0.63  | 2.47  | 3.02  | -3.3  | -1.4  | 1.52  | 1.29  | 1.16  | -2.68 | 0.15  | -2.39 | 0.7   |
| Sox2     | Knockdown | -1 | 6 | -2.38 | 0.89  | 0.41  | 0.66  | 4.43 | -2.35 | 1.85  | 0.82  | 0.28  | 6.83  | 3.25  | 2.91  | 0.76  | 3.97  | 4.67  | 2.7   | 4.27  | 3.67  | 0.74  | 1.51  | 1.53  | -0.4  | 2.52  | -0.91 | -0.91 | -0.1  | 1.4   |
| Nanog    | Knockdown | -1 | 6 | 0.44  | 0.34  | 0.32  | 0.69  | 4.1  | -2.72 | 1.65  | 1.59  | -0.37 | 4.35  | 1.84  | 3.01  | 2.19  | 3.55  | 3.02  | 2.66  | 2.67  | 1.59  | 2.25  | 2.24  | 1.68  | -0.8  | 2.33  | 0.73  | 0.45  | 0.86  | 2.99  |
| Pou5f1   | Induction | 1  | 6 | -4.37 | -2.36 | 0.3   | -0.79 | 7.81 | -3.81 | -0.63 | -7.71 | -5.71 | -2.07 | 0.2   | -1.41 | -1.75 | -4.4  | -3.83 | -3.88 | 1.46  | -3.74 | -1.74 | -3.18 | 5.33  | 3.78  | 5.47  | 0.22  | 4.05  | -1.69 | -2.78 |
| Sox2     | Induction | 1  | 6 | -4.52 | -1.32 | 3.08  | -0.24 | 7.18 | -3.25 | 0.68  | -4.39 | -5.15 | 0.61  | -1.1  | -0.58 | -1.01 | -2.59 | -1.94 | -2.09 | 1.8   | -1.33 | -1.46 | -1.88 | 3.72  | 1.61  | 4.15  | 0.67  | 2.67  | -2.51 | -1.29 |
| Nanog    | Induction | 1  | 6 | -0.65 | -0.45 | -0.56 | 1.06  | 1.17 | -3.74 | 1.17  | -0.3  | -2.33 | 0.73  | -0.35 | 0.24  | 0.2   | -0.46 | -0.58 | 0.12  | 1.85  | -0.01 | 0.45  | -1.02 | 0.07  | -0.34 | 1.26  | 0.79  | -0.23 | -0.19 | 0.55  |
| Tcf3     | Induction | 1  | 6 | -0.09 | -1.87 | 1.03  | 0.81  | 4.19 | -1.52 | 1.13  | -1.67 | -2.44 | -0.5  | -1.72 | 0.73  | 0.72  |       |       |       |       |       |       |       |       |       |       |       |       |       |       |

|          |           |    |   |       |       |       |       |      |       |       |       |       |       |       |       |       |       |       |       |       |       |       |       |       |       |      |       |       |       |       |
|----------|-----------|----|---|-------|-------|-------|-------|------|-------|-------|-------|-------|-------|-------|-------|-------|-------|-------|-------|-------|-------|-------|-------|-------|-------|------|-------|-------|-------|-------|
| Sox2     | Induction | -1 | 7 | -4.83 | -3.25 | -0.97 | -2.41 | 2.87 | -3.17 | 0.38  | -2.78 | -3.63 | 1.37  | 1.51  | -0.82 | -1.98 | -0.01 | 0.12  | -0.86 | -0.15 | 0.65  | -1.61 | -0.82 | -0.24 | 0.34  | 0.9  | -0.47 | -0.35 | -1.26 | -1.14 |
| Nanog    | Induction | -1 | 7 | -2.61 | -2.6  | -1.35 | 1.12  | 2.1  | -2.82 | 0.52  | -3.65 | -1.97 | -1.19 | -0.56 | -0.88 | -2.42 | -1.55 | -1.32 | -1.14 | -0.84 | -0.05 | -2.03 | -1.84 | 0.95  | -0.36 | 1.55 | 2.12  | 2.23  | -0.17 | -1.6  |
| Tcf3     | Induction | -1 | 7 | 0.01  | 1.01  | 0.14  | 1.7   | 1.39 | -1.84 | 2.66  | 1.24  | 1.67  | 4.68  | 5.82  | 2.39  | 0.95  | 3.51  | 3.89  | 3.23  | 4.18  | 5.54  | 1.68  | 1.82  | 1.04  | 0.19  | 0.87 | 0.05  | 2.35  | -1.11 | 2.52  |
| Klf4     | Induction | -1 | 7 | -4.17 | -0.71 | 1.43  | 0.71  | 7.94 | 0.53  | -0.11 | -6.64 | -8.92 | 0.71  | 0.29  | 1.11  | -1.15 | -3.65 | -2.57 | -3.83 | 3.35  | -0.6  | -1.02 | -3.33 | 5.95  | 2.62  | 6.2  | 2.07  | 3.52  | 0.08  | -1.37 |
| Tcfcp2l1 | Induction | -1 | 7 | -1.31 | -0.86 | -1.12 | 1.06  | 3.74 | -4.27 | -2.73 | -2.91 | -2.71 | -0.44 | 0.61  | -0.28 | -0.87 | -1.68 | -0.94 | -0.52 | 0.06  | -0.16 | -0.97 | 0.04  | 3.8   | 4.1   | 3.35 | 2.74  | 3.8   | 0.24  | -0.19 |
| Cdx2     | Induction | -1 | 7 | 1.54  | -0.62 | 1.95  | 0.59  | 1.81 | 0.32  | 1.27  | 1.64  | 0.21  | 2.7   | 0.98  | 1.74  | 0.83  | 1.97  | 0.68  | 2.25  | 1.08  | -0.44 | 1.29  | 0.5   | 0.3   | 0.44  | 1.17 | 1.48  | -0.21 | -0.21 | 0.81  |
| Myod1    | Induction | -1 | 7 | -3.75 | -1.81 | 0.33  | -0.85 | 5.97 | -1.65 | 0.18  | -4.58 | -4.11 | -2.07 | -1.46 | -1.58 | -1.43 | -3.24 | -3.62 | -3.9  | 2.1   | -2.09 | -0.82 | -2.94 | 3.31  | 2     | 2.72 | -0.19 | 3.48  | -0.62 | -1.21 |
| Sfp1     | Induction | -1 | 7 | -3.18 | -0.97 | -0.23 | -1.69 | 1.97 | -0.44 | 0.69  | -3.49 | -3.54 | -2.18 | -1.25 | 0.28  | -0.56 | -2.4  | -2.33 | -3.14 | 2.93  | -1.3  | 0.63  | -3.46 | 0.32  | 0.72  | 0.63 | -2.22 | 0.93  | -2.6  | -2.25 |
| Pou5f1   | Knockdown | -1 | 7 | -1.64 | 2.6   | 3.07  | 1.52  | 3.86 | -1.4  | 4.6   | 0.6   | 0.61  | 6.69  | 6.4   | 1.68  | -1.09 | 3.92  | 4.24  | 2.39  | 2.76  | 4.11  | -1.17 | 0.18  | 1.84  | 2.65  | 2.13 | -1.4  | 0.76  | -1.14 | 1.22  |
| Sox2     | Knockdown | -1 | 7 | 0.49  | 3.41  | 2.81  | 2.47  | 5.14 | -0.13 | 4.53  | 2.92  | 2.97  | 8.56  | 6.32  | 4.98  | 2.98  | 6.02  | 6.4   | 4.87  | 5.74  | 6.08  | 2.51  | 3.25  | 2.79  | 1.79  | 3.9  | 0.95  | 0.68  | 0.94  | 3.53  |
| Nanog    | Knockdown | -1 | 7 | 2.72  | 2.59  | 2.63  | 2.16  | 4.92 | -0.99 | 3.34  | 3.79  | 1.9   | 6.6   | 3.53  | 4.81  | 3.79  | 5.84  | 5.28  | 5.04  | 3.8   | 3.44  | 3.42  | 3.87  | 3.21  | 2.29  | 4.19 | 2.26  | 2.31  | 2.27  | 5.04  |
| Pou5f1   | Induction | 1  | 7 | -3.61 | -2.83 | -0.1  | -0.12 | 7.5  | -3.25 | -0.04 | -6.33 | -5.37 | -1.82 | -0.18 | -1.25 | -1.27 | -3.79 | -3.1  | -3.17 | 1.07  | -3.29 | -1.42 | -3.06 | 5.21  | 2.98  | 4.75 | 0.53  | 4     | -1.45 | -2.83 |
| Sox2     | Induction | 1  | 7 | -3.04 | -0.22 | 3.6   | 0.45  | 7.33 | -1.5  | 1.79  | -2.44 | -3.37 | 1.8   | 0.15  | 0.45  | -0.33 | -1.48 | -0.43 | -0.8  | 2.72  | 1.43  | -0.43 | -0.85 | 4.14  | 2.36  | 4.76 | 1.21  | 2.38  | -1.17 | 0.72  |
| Nanog    | Induction | 1  | 7 | -1.49 | -1.68 | -1.46 | 0.08  | 0.86 | -4.03 | 0.5   | -1.4  | -1.97 | -0.63 | -1.47 | -0.91 | -0.42 | -1.23 | -1.45 | -0.87 | 0.45  | -0.76 | -0.94 | -1.66 | -0.25 | -0.6  | 0.59 | -0.15 | 0.38  | -0.96 | 0.24  |
| Tcf3     | Induction | 1  | 7 | 0.42  | -1.21 | 1.29  | 1.14  | 4.52 | -1.12 | 1.7   | -1.31 | -1.99 | -0.44 | -1.77 | 0.58  | 0.25  | -0.42 | -0.94 | -0.02 | 0.62  | -2.22 | -1.34 | 0.89  | 1.23  | 0.78  | 2.84 | 1.77  | 0.34  | 1.77  | 0.48  |
| Klf4     | Induction | 1  | 7 | -6.66 | -1.37 | 3.03  | 1.47  | 9.36 | -2.82 | -0.01 | -7.21 | -6.04 | -0.64 | -1.43 | -0.47 | -1.5  | -4.19 | -4.43 | -4.68 | 2.25  | -2.43 | -0.63 | -4.01 | 6.64  | 6.07  | 6    | 1.38  | 3.09  | -0.64 | 1.03  |
| Tcfcp2l1 | Induction | 1  | 7 | -2.18 | 0.33  | 1.21  | 0.9   | 4.49 | -3.14 | 0.62  | -1.84 | -3.02 | 2.02  | -0.9  | 0.45  | -0.34 | 0.63  | 0.58  | 0.42  | -1.11 | -0.85 | -1.1  | -0.46 | 0.55  | -0    | 2.02 | 1.57  | 0.76  | -0.04 | 1.2   |
| Cdx2     | Induction | 1  | 7 | 0.61  | -0.51 | 0.52  | 3.59  | 9.61 | -3.92 | 2.67  | 0.22  | -1.13 | 2.45  | 2.04  | 1.54  | 0.58  | 1.67  | 1.16  | 1.68  | 0.07  | 0.64  | -0.9  | 2.73  | 5.27  | 3.53  | 7.54 | 3.15  | 0.16  | 0.8   | 1.71  |
| Myod1    | Induction | 1  | 7 | -4.93 | 0.19  | 3.6   | 0.23  | 8.65 | -1.25 | 1.89  | -4.64 | -5.25 | -0.16 | -0.23 | 0.6   | -0.33 | -2.44 | -2.34 | -3.18 | 2.6   | -1.26 | -0.05 | -2.66 | 5.44  | 4.93  | 5.08 | 0.22  | 3.54  | -0.96 | 0.37  |
| Sfp1     | Induction | 1  | 7 | -5.46 | -0.58 | 3.79  | -0.65 | 9.09 | -1.11 | 1.61  | -5.17 | -5.11 | -1.42 | 0.6   | -0.74 | -0.06 | -4.07 | -3.83 | -4.58 | 3.21  | -2.65 | 0.48  | -4.34 | 4.94  | 2.78  | 5.2  | -0.45 | 3.97  | -1.22 | 0.31  |
| Pou5f1   | Knockdown | 1  | 7 | -1.54 | -0.37 | 2.81  | 0.78  | 4.9  | -1.39 | 0.94  | -1.82 | -3.5  | 2.09  | 2.37  | 0.98  | -0.12 | -0.63 | 0.11  | -0.18 | 1.29  | 0.84  | 0.89  | -0.13 | 3.2   | 1.28  | 2.27 | 0.99  | 1.74  | 0.35  | 0.22  |
| Sox2     | Knockdown | 1  | 7 | -0.46 | -1.55 | -0.35 | 0.88  | 6.04 | -2.93 | -0.8  | -2.41 | -2.53 | -0.72 | -0.4  | 1.3   | 0.74  | -1.29 | -1.54 | -0.51 | 1.31  | -1.99 | -0.09 | 0     | 3.3   | 2.46  | 5.16 | 2.31  | 1.48  | 0.1   | 0.53  |
| Nanog    | Knockdown | 1  | 7 | -2.83 | -2.95 | -1.5  | 1.33  | 7.15 | -3.95 | -0.5  | -5.65 | -4.29 | -0.35 | 1.46  | -0.95 | -2.41 | -2.42 | -1.52 | -2.06 | -0.19 | 0.29  | -3.91 | -1.7  | 3.93  | 1.74  | 4.61 | 2.89  | 2.76  | -1.46 | -1.35 |

## Supplementary Table S4. Target genes regulated by transcription factors

Target genes regulated by transcription factors (TFs) were identified from TF binding sites and gene expression change after TF manipulation.

Statistical criterion: EPFP < 0.30

| Transcription factor | Manipulation | Up/down regulation | N genes | Gene list                                                                                                                                                                                                                                                                                                                                                                                                                                                                                                                                                                                                                                                                                                                                                                                                                                                                                                                                                                                                                                                                                                                                                                                                                                                                                                                                                                                                                                                                                                                                                                                                                                                                                                                                                                                                                                                                                                                                                                                                                                                                                                                                                                                                                                                                                                                                                                                                                                                                                                                                                                                                                                                                                                              |
|----------------------|--------------|--------------------|---------|------------------------------------------------------------------------------------------------------------------------------------------------------------------------------------------------------------------------------------------------------------------------------------------------------------------------------------------------------------------------------------------------------------------------------------------------------------------------------------------------------------------------------------------------------------------------------------------------------------------------------------------------------------------------------------------------------------------------------------------------------------------------------------------------------------------------------------------------------------------------------------------------------------------------------------------------------------------------------------------------------------------------------------------------------------------------------------------------------------------------------------------------------------------------------------------------------------------------------------------------------------------------------------------------------------------------------------------------------------------------------------------------------------------------------------------------------------------------------------------------------------------------------------------------------------------------------------------------------------------------------------------------------------------------------------------------------------------------------------------------------------------------------------------------------------------------------------------------------------------------------------------------------------------------------------------------------------------------------------------------------------------------------------------------------------------------------------------------------------------------------------------------------------------------------------------------------------------------------------------------------------------------------------------------------------------------------------------------------------------------------------------------------------------------------------------------------------------------------------------------------------------------------------------------------------------------------------------------------------------------------------------------------------------------------------------------------------------------|
| Pou5f1               | Induction    | 1                  | 134     | Dlx5, Slc9a2, Tbx15, Il10, Lypd1, Cxcl12, Irf2, Tcfap2d, Dlx6os2, Kctd16, 5033426E14Rik, Dync1i1, Ptprt, Prox1, Gpr120, Tbx18, Grik4, Slc17a6, Hivep2, Hlf, E130006D01Rik, Gria3, Fstl1, Ttc12, 2310010M24Rik, Nudt7, Zfp608, Il20ra, Nsg2, Dydc2, Ephb1, Six3, Spon1, Ndufa4l2, Msx1, Sema6a, Rfx4, Slc35d3, Dll4, Tnfrsf13c, Nr2f1, Zfp677, Runx1t1, D1Ert471e, Zic1, Rerg, Lypd6, Id1, Sall2, Nxp1, Id2, Mex3b, Phactr3, Sp8, Lhx1, Tmem54, Dlx2, Hhip1, Foxd1, Erv3, Prom1, Grip1, Cdx4, Baal, Meis2, Nos1ap, Setd7, Efcab1, Arhgef3, Smarca2, Ascl2, Id3, Insm1, Nt5e, Fgl2, Vax2, Arl4c, Arpp21, Rgma, Slc35f1, Fgf5, Psd3, Trio, Bst2, Dnmt3a, Wnt3, Reln, Atxn1, Depdc7, Galnt1, Hoxd1, Eph1, Tmc7, Otx1, Lhx2, Atoh1, 5430440P10Rik, Meis1, Sfrs12, Csm2, Syt17, Id4, Figla, Zfhx3, Tcam1, Zfp3612, Pkia, Efnb2, Zbtb16, Mafb, Pcdh8, Jph2, Gng4, 5330430C04Rik, Fgd2, Lphn2, Ebf1, Cdkn1c, Sertad4, C130089K02Rik, Bcl11a, Tcfap2a, Atn1, Egr2, Lrrc8e, Fuca2, Dach1, Dnajb8, Popdc3, Duoxa1, Cxcl14, Irf6, Ovol2, Kcnp3,                                                                                                                                                                                                                                                                                                                                                                                                                                                                                                                                                                                                                                                                                                                                                                                                                                                                                                                                                                                                                                                                                                                                                                                                                                                                                                                                                                                                                                                                                                                                                                                                                                                                                    |
| Sox2                 | Induction    | 1                  | 340     | Wnt5a, Hoxa1, Gad1, Peg12, Hs3st3b1, Pcdh19, Flt1, Ptger2, Mycl1, Id4, Flvcr2, Kit, Adrb1, Plekhg1, Ppm1e, Lonrf1, Neurod1, Btln1, Npy, Frat1, Foxd4, Ccdc19, Nrp2, Cd2, Serinc5, St8sia1, Srgap3, En1, Rgma, A930009N24, Xpnpep2, Slc22a23, Sh2d4b, Slc6a3, Stac, Slc35f3, Rerg, Ly75, Cpv1, Cd109, Pga5, Sox21, Dner, Cdh3, Trim36, Rab30, Zbtb44, Nfe2l3, Limch1, Ebf2, Tcfap2a, Ccdc46, Nod2, Shroom3, Sfrp2, Irx2, St8sia6, Creb3l2, Ntrk2, Cd40, Sgce, Sp8, Glis3, Nt5e, Pcdh8, Hsd17b3, D430015B01Rik, Rasgrp1, D0H4S114, Scmh1, Frmd4b, Ppp1r16b, Mobp, Nefl, Ndr4, Jam3, Vim, Lycat, Ppap2b, Isl2, Mobkl2c, St6gal1, Fsd11, Saa3, Inhbc, 9030613N10Rik, Gna14, Map4k3, Rbp1, Cidea, Meis2, Spsb4, Tle1, Rax, Meis1, Il20ra, Lrig1, Fez1, Onecut1, Hspb8, Yes1, Mbp, Tmem51, Rragd, Tnfrsf18, Zswim6, She, Zbtb10, Ypel2, 1810011O10Rik, Rgnef, Klhl21, Pgm1, Rgs8, Galnt4, Sema6a, Mt2, Satb2, Synj2, Mfng, Mical2, Pnlp, Calm1, Sesn3, Vegfa, Ror1, Igf1r, Prss16, Accn1, Osbp11, Gprc5a, Ccdc39, Myo10, Cd24a, Ap3m2, Prox1, C1qtnf1, Fabp1, Man2a1, Elovl7, 4922501L14Rik, Il10rb, Tcfap2c, Onecut2, D4Bwg0951e, Dennd3, Aldh1a2, Cald1, Slc22a15, Phactr1, Alpk3, Tbx3, Aim1, Cdgap, Shb, Mli5, Aadat, Cyp1b1, Kank1, Muc13, Prtg, RP23-157O10.7, Adamtsl1, D1Ert471e, Parp14, Scn1a, Cxcl12, Tyw3, Foxd1, Gpx2, Marcks, Tcfap2d, Lats2, Ttc28, Lrrc8e, Msx2, Lmcd1, Casz1, Ptpzr1, Acot1, Slc35d3, Sccpdh, Slc25a4, Cachd1, Pde4dip, Stard13, Ttc30a1, Aff1, Fndc1, Gm266, Robo1, Tdh, Ddx58, Lhx5, Ugdh, Hivep3, Gm672, D330037F02Rik, Fgl2, Fndc3b, Tmem136, Zfp608, Vegfc, Jazf1, 1200015N20Rik, Trp63, Csnk2a2, Rgmb, Tgfa, Arntl, Nrarp, Akap11, Barhl2, Lima1, Letmd1, Pik3r1, Dact1, Ppef2, Khdrbs3, Fgfr1, Slc29a1, Rai14, Map3k8, Dbx2, Sall3, Nxp3, Igf2bp2, 4930432N10Rik, Car12, Frem2, Sipa111, Fbp1, Ky, Txlnb, Asns, Pde8b, Crtac1, Muc1, Cebp, Gnas, Wscd1, Anxa11, Rnf7, Pdzd7, Padi4, Fstl1, Mobkl2b, Frmd6, Lmo7, Lrrc15, Grid1, Pknx2, Gpc4, Ttc12, D8Ert482e, Prmt8, Klhl2, D930028F11Rik, Fgfr2, Nxn, Dgki, Lrrn2, Otx2os1, H2afy2, Nr6a1, 1700095B10Rik, Stxbp3a, Sox13, Phc2, Kifc3, Tmem22, Entpd1, Acpl2, Casq2, Jag1, Pla2g7, Tiam1, 4930563F08Rik, Rbl1, Nudt7, Eph4, 1500009L16Rik, Zfhx3, Dpys, Zc3hav1, Rcn1, Gm687, Heg1, 9330199F22Rik, Otx2, Zmynd10, Cuedc1, Emi1, Lrig3, Trib2, 1810049I09Rik, 3732407C23Rik, Insm1, Slc9a9, Tnfrsf19, Galnt9, Ephb1, Comm3, Nfib, Uhrf2, Grsf1, Nkx6-2, Lama1, Tbx4, Nsg2, Itga1, Prickle1, Dll1, Syde2, Atxn1, Lrrn1, Cldn5, Pftk1, Gm1683, Ildr1, Ebp4, 114b, 1500001A10Rik, Aldh1b1, 2410152P15Rik, Mt1, Trak1, Cnpy1, Rnd2, Mex3b, Dusp10, Podxl, EG666529, Nudt4, Khdrbs1, Zfp563, Gadd45a, Pgc, C230094A16Rik, Acvr1b, Fabp3, |
| Nanog                | Induction    | 1                  | 0       |                                                                                                                                                                                                                                                                                                                                                                                                                                                                                                                                                                                                                                                                                                                                                                                                                                                                                                                                                                                                                                                                                                                                                                                                                                                                                                                                                                                                                                                                                                                                                                                                                                                                                                                                                                                                                                                                                                                                                                                                                                                                                                                                                                                                                                                                                                                                                                                                                                                                                                                                                                                                                                                                                                                        |
| Tcf3                 | Induction    | 1                  | 48      | Tinagl, Mdga1, Tmem22, 9030613N10Rik, Sox9, Fhl2, Gsn, Pmp22, Aldh1a3, Col13a1, Plxnd1, Gpr103, Pcdh7, Sorcs2, Pax3, Ets1, Chst1, Dkk1, Il10rb, 2210408F21Rik, Sez6, Kif26b, Crb2, Slc25a24, 4631426J05Rik, Crim1, Peg12, Heg1, Ppp1r3b, Pitx2, Zeb2, Col4a2, Afap111, Dlx2, Lrrc8e, Cbx4, Setd7, Elfn1, Itgb3, Id3, Stk32c, Gnas, Hoxa1, Mafb, Zmiz1, Unc5b, Tgfb3, Vim,                                                                                                                                                                                                                                                                                                                                                                                                                                                                                                                                                                                                                                                                                                                                                                                                                                                                                                                                                                                                                                                                                                                                                                                                                                                                                                                                                                                                                                                                                                                                                                                                                                                                                                                                                                                                                                                                                                                                                                                                                                                                                                                                                                                                                                                                                                                                              |

|          |           |   |     |                                                                                                                                                                                                                                                                                                                                                                                                                                                                                                                                                                                                                                                                                                                                                                                                                                                                                                                                                                                                                                                                                                                                                                                                                                                                                                                                                                                                                                                                                                                                                                                                                                                                                                                                                                                                                                                                                                                                                                                                                                                                                                                                                                                                                                                                                                                                                                                                                                                                                                                                                                                                                                                                                                                                                                                                                                                                                                                                                                                                                                                                                                                                                                 |
|----------|-----------|---|-----|-----------------------------------------------------------------------------------------------------------------------------------------------------------------------------------------------------------------------------------------------------------------------------------------------------------------------------------------------------------------------------------------------------------------------------------------------------------------------------------------------------------------------------------------------------------------------------------------------------------------------------------------------------------------------------------------------------------------------------------------------------------------------------------------------------------------------------------------------------------------------------------------------------------------------------------------------------------------------------------------------------------------------------------------------------------------------------------------------------------------------------------------------------------------------------------------------------------------------------------------------------------------------------------------------------------------------------------------------------------------------------------------------------------------------------------------------------------------------------------------------------------------------------------------------------------------------------------------------------------------------------------------------------------------------------------------------------------------------------------------------------------------------------------------------------------------------------------------------------------------------------------------------------------------------------------------------------------------------------------------------------------------------------------------------------------------------------------------------------------------------------------------------------------------------------------------------------------------------------------------------------------------------------------------------------------------------------------------------------------------------------------------------------------------------------------------------------------------------------------------------------------------------------------------------------------------------------------------------------------------------------------------------------------------------------------------------------------------------------------------------------------------------------------------------------------------------------------------------------------------------------------------------------------------------------------------------------------------------------------------------------------------------------------------------------------------------------------------------------------------------------------------------------------------|
| Klf4     | Induction | 1 | 394 | Dkk1, Mal, Btn1, Wnt10b, 4931408C20Rik, Hoxc12, Pi16, Gpr83, Nppb, 4732465J04Rik, Flrt1, Npr3, Emp1, Cpm, Kcnc2, Wnt6, S100a14, Mdga1, Lgi3, Map3k6, Atp2a3, Dlx3, Cyp4f39, Lgr6, Gprc5a, Klf5, Zfp697, Caskin1, Eya2, Adm, Slc23a3, Slc29a3, Klf13, Hspa12a, 4922501K12Rik, Pcolce2, Comp, Atp2c2, Sfrp1, Cspg5, 8430427H17Rik, Frat1, Kcnab3, 4930523C07Rik, Nuak1, Slc32a1, Mgl1, Aqp3, Stmn3, Tead4, Dlgap3, Garnl4, Fgf3, Tmem16a, Scaras5, Islr2, Kiss1r, Nrnx2, Scn2b, Ednra, Epm2a, Gna15, Sphk1, Prrx2, Nova2, Nags, Thbd, Ptgs2, Plcd3, Adamts15, Flt1, Lhx5, Cmtm3, Pla2g4e, Rxra, Slc2a10, Ehdhc3, Adcy2, Sdc3, Tc11, Hs3st3a1, T, Dtd9, Ablim1, Spesp1, Runcdc3a, Camk2n1, Tppp3, Pou4f2, Rhbdl2, Adrb1, Bdkrb2, Flrt2, Hand1, Ahnak, Reep1, Fosl2, Kdelr3, Sorbs3, Prdm13, Pad12, Brunol5, Gsg1, Fmnl1, Mpped2, Dnahc8, Wnt10a, Cxcl14, Rhbq, Slc1a1, Tmem179, Hepacam, Sna1, Plxnd1, Gata2, Itgb3, Mall, Tbx3, 5033426E14Rik, Asgr2, Pyy, Tmem132e, Cxcr5, Vav1, Hoxc13, Slc4a11, Nbl1, Mmp14, Abcc3, BC004044, Pygl, Crim2, Dnahc2, Unc5a, Hrk, Stra8, Ngef, Cxcr7, Pde8a, Tram111, Ddit4l, Fyn, Pigz, Rasgrf2, Fzd10, Nt5e, Ptf, Slc16a9, Gadd45b, Lingo1, Fcgr3, Nod2, Fstl5, Kcnc4, Fxyd5, Ly6h, Acbd4, 9530059O14Rik, Cspg4, Centd2, Ntn4, Jakmp1, Chrng, Kcnk6, Arsb, Id1, Xkr7, D9Ert280e, Cdkn1a, Galnt2, Syt1, Capn2, Wnt2b, Slc36a4, Rnf19b, Kcnk3, Id2, Gsx2, Nr4a3, Bean, Rusc2, Spata2L, Ror2, Fgfr4, S100a6, Itga11, Nudt7, Ccdc113, Nov, Phlda2, Bmp7, Rtn4r, Dapk2, Nfic, Lrrm3, Hck, Lrrfip1, Hic1, Armc2, Exoc3l2, Aqp5, Mapt, Muc13, Foxl2, Flnb, Gm1964, Adora1, Man1c1, Paqr9, Anxa2, Acpp, Tinagl, Myl7, Camk2a, Htra1, Gpihbp1, Nr5a2, Shox2, Slc6a7, Osm, Sfxn3, A830073O21Rik, Isl2, Tmem198, Pqlc1, Cdc42ep2, Arhgef19, Wnt7b, Crtac1, Ndrgr1, Pik3c2b, Plekhg3, Tcfcp2l1, Zbtb10, Klrg2, Grid2ip, Bai1, Casc1, Rps6ka4, Myo1b, Mtap6, Zfp503, Grrp1, Aldh3a1, Tas1r2, Ripk3, Igsf21, Slc7a1, Pdgfa, Dcll1, Bmp4, St8sia1, Tubb2a, Itga9, Adamts8, Lgals3, Ppargc1b, Rufy4, Vax2, Rcn1, Ahsg, Bmp8a, B2m, Crip1, Kcns3, Samd5, Ropn1, Ddn, Gtf2a1, Sned1, Thsd1, Abhd5, P4ha2, Phldb1, Chst8, Farp1, Efna3, Slc45a3, Crabbp1, Zfp217, Me1, Wnt11, P2ry2, Agpat9, Vstm2l, Ggt1, Etnk2, Gfra2, Atf3, Tubb3, Emi2, Ankrd26, Dnajb3, Ngfr, Gp5, Gsn, Plek2, Adssl1, Zfp536, Gas2l2, Prkcdp, Amigo2, Cbr4, Trim7, Tcfap2b, Rasl12, G530011O06Rik, Elovl3, Id3, Trim47, Il27ra, Sp6, Cdc2a, Map4k1, Mafb, Fbln2, Cpeb3, Hs3st3b1, Rtbdn, Sox17, Hand2, Phactr1, Fos, Tbx1, Ncam1, Dnahc17, Xaf1, Myl4, Slc16a5, Prael7, Strn, Tns1, Camk2d, 4931406H21Rik, Ucp1, Hsh2d, Hils1, Pip4k2a, Amigo1, Ccdc33, Spbs1, Dleu2, Adbl2, Cdrta, Krt19, Col5a1, Pnma2, Galnt7, Ppp1r9b, Krt18, Lmo7, Edg6, Cux2, Ninj2, Gas7, Sfn, Tspan1, Fabb6, Scd1, Hk1, Nfe2l3, Cd37, Plec1, Nr4a1, Ak3, 1810015C04Rik, Klf3, Atic, Vgll4, Insl3, Hrc, Stk22s1, Upk3b, Pmp22, Slco2a1, 5330426P16Rik, Ppapdc2, Mobkl2c, Grik4, Robo1, Cryz, Sostdc1, Tmem132d, Tgm2, Zdhhc22, Tdpoz3, Ablim2, Krt6a, Niban, Pdgfrl, Fndc3b, Cpeb2, Hes1, Rev3l,                                                                                                      |
| Tcfcp2l1 | Induction | 1 | 54  | Smarcd3, Plscr4, Nkx6-3, Gpr20, Dock10, Klhdc7a, Inhbb, Ppp1r3c, Ptges, Wscd2, Igsf21, Ffar2, Tmem117, Spns3, Cplx3, Rnf144b, Fgg, Hspa1a, Pib5pa, Adipoq, Kcnk4, Rapgef3, Cpt1a, Zdhhc14, Chrna4, Mras, Slc6a1, Hebp1, Ica11, Fmn1, Dkk1l, Slc7a8, Pdzrn4, Pde8a, Slc15a1, Crtac1, Hs3st6, Prmt8, Osgin1, Hap1, Rasd1, Ly75, Myom2, Slc30a10, Slit2, Tbx3, Slc6a3, Elovl7, Stambp1, Wnt3a, Mst1r, Ly6k, Kctd19, Gprc5a,                                                                                                                                                                                                                                                                                                                                                                                                                                                                                                                                                                                                                                                                                                                                                                                                                                                                                                                                                                                                                                                                                                                                                                                                                                                                                                                                                                                                                                                                                                                                                                                                                                                                                                                                                                                                                                                                                                                                                                                                                                                                                                                                                                                                                                                                                                                                                                                                                                                                                                                                                                                                                                                                                                                                        |
| Cdx2     | Induction | 1 | 400 | Pla2g7, Aqp9, Tmprss2, Trpm6, Gsx2, Sh2d4a, Pla2g12b, Itga11, Dct, Hoxa9, Popdc3, Csta, Dsc2, Smpd3a, Sox6, Nedd9, Taar2, Rassf4, Slc9a2, Hoxb8, Hoxa7, Prdm6, Atnx1, Bves, Abca4, Niban, Greb1, Mgat4c, Slc18a2, Slc25a21, Hoxc6, Tmtc2, Rgs8, Ntng1, Adh1, 9930021J17Rik, Papss2, Bhlhb5, Elf5, Vav3, Edn1, Nav3, Ptpb, Msx1, Hoxc9, Igf2, Prom1, Pkp1, Foxf2, Btn1a1, Cmtm8, Ppp1r3b, Maf, Esrg, Zbtb44, Insl6, Esx1, Trpc3, Igf2as, Il10rb, Plid1, Tpbq, Pmp22, Khlh29, Gucy1a3, C1ql3, Slc28a3, A830039N20Rik, Psd3, Pou4f3, Speg, Rnf103, 1200009O22Rik, Kcna6, Gata6, Hipk2, Prkccq, Camkk2, Sgpp2, Sgce, Slc22a23, Foxb2, Asgr1, Mpmn, 4930511J11Rik, Tph2, Aph1c, Atp8a1, Vegfa, Flt1, Smad6, Cib2, Chst2, Anxa3, Erg, Cd59a, Rgma, Sgpp1, Guca2a, Sccpdh, Ednra, Jak1, Pdzrn3, B3gat2, Zfp641, Hspb8, Cartpt, D430019H16Rik, Scaras3, Dusp14, Oas1f, Foxq1, Ankrd44, Akap6, Fbxo32, Iqch, Hoxd4, Arhgap18, Cux2, Hmx3, Hip1, Znrf4, Nt5dc3, Agbl2, Ankrd57, Pax3, Zbtb10, Dnahc17, Asxl3, Hoxb7, Camk2d, Bmp2, 5430433G21Rik, Odz3, Cobll1, Slc15a2, Isl2, Pdpn, Dhrs3, Eya2, Dscam, Hhip, Esr1, Gpr120, Cbln2, Wipf1, Galnt14, Sobp, A730045E13Rik, Myh10, D630004K10Rik, Siah2, Dock8, Peg10, P4ha3, Clie6, Cald1, Cda, St8sia6, Slc22a15, Bmper, Dmrt3, Astn1, Bean, Tes, Nr2e3, Calm1, Hoxc8, E130319B15Rik, Snph, Kank1, Dpysl2, Glt28d2, Pcp4, St3gal1, 4930563F08Rik, Oxct1, Pde4dip, Bhmt, Pkd12, Atoh1, Speer4d, Cebpa, Mnx1, 1110006G14Rik, Gng12, Tph1, Cmpk2, Crtc3, Vax1, Cacna2d2, Abca5, Gpr177, Gcgr, Oat, Zdhhc2, Dleu2, Fosl2, Rnf24, H19, Cxcl14, Rdh10, Wnt7b, Prickle1, Thbs4, Errf1, Gulp1, Adcy5, Hoxa3, Ptpm, Rin2, Zfp385b, Large, Hoxc4, Fndc3b, Gnao1, Id2, Nos1, Efcab5, Zfp503, Eif4e3, Mpped2, Wnt5b, Shroom3, Igf1, Arhgap25, Thrb, Nin, Arsb, Ppp2r2b, Cap1, Ptf1a, Tmem117, Zfp324, Mmd, Olfm1, Mllt3, 5730507A09Rik, Ifngr2, Sctr, BC037703, Al427515, Ptpla, Zadh2, Itgb3, Ifnar2, Cbln4, D430041D05Rik, Scml4, Ttc28, Dapk2, Tnfnsf11a, Pde9a, Bcl6, Slc16a7, Psap, Selenbp2, Gal, Tnnt3, Aim1, Pam, Dmrt2, Mylip, Pan3, Smarca2, Efnb1, Tspan18, Pip4k2a, Cbara1, Plagl1, Maff, Myrip, Cdh2, Slc22a21, Cd47, Prei4, Wnt16, Vcl, Ociad2, Kbtbd5, Lypd6, Stab2, Cpv1, B930049P21Rik, Peli1, Scn5a, Ptpn20, Irs1, Pak7, Hsf5, Fgf2, Accn1, Npy, Scrn1, Fos, App, 9030425E11Rik, Dennd1a, Rtn1, Gem, Th, Micalcl, Trio, Ugpp2, Cebpbb, 4930458A03Rik, Gliplr2, 4732465J04Rik, Tmeff2, Wnt5a, Cfc1, Calu, Elnf1, Fabb5, Acbsg1, Aldh1a3, Sgcb, Etv2, Fhdc1, 1500015O10Rik, C130089K02Rik, B4galnt2, Heatr6, AW049604, Adamts3, 4933416C03Rik, Lrrc4b, C030014K22Rik, Kcnd2, Tmem30b, Nr2f2, Tmem20, Jak2, Msx2, Fgfbb3, Cacna1h, Slc30a4, Bmp6, Akt1, Hs3st3b1, Lmx1b, Pbx3, Jph2, Pax9, Lmo4, Elovl4, Rnf7, Phldb3, Irs2, Rnf43, E2f6, Rhov, Aqp3, Foxo1, Tmtc4, Sfi1, Tbc1d1, Dnajb3, Gse1, Nr2f1, Tiam2, Nr6a1, Lrp2, Fgfr1, Slc26a4, Grik3, Speer8-psi1, Hoxb4, Blnk, Sparcl1, Atg16l2, 2810022L02Rik, Hpgd, Prtg, Zfp251, Slc8a1, Adra2a, Kcnc4, Gpr6, Zfand3, Bace2, Grk4, Ypel5, Nrp1, Kctd15, Arhgap21, Tcfef, Rxra, Gch1, Zswim6, Glt8d3, Tex18, Ggta1, Plekhg3, Hspa1b, Gpr116, Cap2, Cdkn2c, Pdia5, Itsn2, |



|        |           |   |     |                                                                                                                                                                                                                                                                                                                                                                                                                                                                                                                                                                                                                                                                                                                                                                                                                                                                                                                                                                                                                                                                                                                                                                                                                                                                                                                                                                                                                                                                                                                                                                                                                                                                                                                                                                                                                                                                                                                                                                                                                                                                                                                                                                                                                                                                                                                                                                                                                                                                                                                                                                                                                                                                                                                                                                                                                                                                                                                                                                                                                                                                                                                                                                   |
|--------|-----------|---|-----|-------------------------------------------------------------------------------------------------------------------------------------------------------------------------------------------------------------------------------------------------------------------------------------------------------------------------------------------------------------------------------------------------------------------------------------------------------------------------------------------------------------------------------------------------------------------------------------------------------------------------------------------------------------------------------------------------------------------------------------------------------------------------------------------------------------------------------------------------------------------------------------------------------------------------------------------------------------------------------------------------------------------------------------------------------------------------------------------------------------------------------------------------------------------------------------------------------------------------------------------------------------------------------------------------------------------------------------------------------------------------------------------------------------------------------------------------------------------------------------------------------------------------------------------------------------------------------------------------------------------------------------------------------------------------------------------------------------------------------------------------------------------------------------------------------------------------------------------------------------------------------------------------------------------------------------------------------------------------------------------------------------------------------------------------------------------------------------------------------------------------------------------------------------------------------------------------------------------------------------------------------------------------------------------------------------------------------------------------------------------------------------------------------------------------------------------------------------------------------------------------------------------------------------------------------------------------------------------------------------------------------------------------------------------------------------------------------------------------------------------------------------------------------------------------------------------------------------------------------------------------------------------------------------------------------------------------------------------------------------------------------------------------------------------------------------------------------------------------------------------------------------------------------------------|
| Myod1  | Induction | 1 | 402 | Arid5a, Smarcd3, Id4, Rgs8, Sync, Prox1, Igfbp5, Chrb1, 2610035D17Rik, Rassf4, Slc44a3, Chrnl2, Cdh15, Rgs16, Lingo4, Syt13, Atp2a1, Zbp1, Nol3, Id3, Hrc, Cldn5, Cxcr4, Lfng, Tbx18, Hes6, Gpr142, Myh7, Cd97, Acta1, Des, Gata2, Chr2, Nptx1, Cugbp2, Elfn1, Wnt7b, Lgr5, Id2, Hhat, AK220484, Fgf5, Arsj, Speg, Pknox2, Dmrt3, Pcdh21, Vgll2, Gpr20, Dusp13, C530008M07Rik, Myom2, Kcnb1, Sytl3, Snai2, Vwa1, Pla2r1, Mobp, Dennd3, Chrng, Parp12, Tppp3, Man2a1, 1810011O10Rik, Reep1, Trim72, Kcnk12, Lmcd1, Myocd, Cdc42ep3, Plb1, Pd e4dip, Prdm8, Tubb3, Obsl1, Baiap2l1, Grin1, Fhdc1, Asb10, Rhcg, Kcnj12, Tmem198, Clic5, Ifr2, Pax3, Snai1, Tnnc2, 1700094C09Rik, Abca4, Nol4, Ankr44, Pdlim4, Bik, Mbp, Hspa12 a, Nexn, Ramp2, Zbtb10, Nuak1, Pnmal2, Cstad, Pde2a, Mlph, Gadd45b, Lrrk2, Eya4, Gp9, Lzts1, Cygb, Tap2, Tll7, Plekhh3, 4933400N17Rik, Pla2g4e, Dok7, Mical2, Tbx3, Msx2, Pdzr n3, Slc6a7, Rgs2, Cux2, Eya2, 4931406H21Rik, Tph2, Mybph, Rgs11, Foxf2, Gm1337, Pde8a, Slc25a24, Dbndd1, Gal, Sfxn5, Pmp22, Rai1, Notum, Tigd3, Ninj1, Cdkn1a, Mgat5b, Hs3st 3b1, Arhgap28, Bdkrb2, Smad3, BC037703, Ttc28, Ppp2r2b, Myod1, Gatm, Atnx1, Sema3c, Zfpm1, Rab6b, Gpr126, Barx1, Sobp, Ckb, Socs1, Thsd7a, Gprc5b, 1110002O04Rik, Fbxo3 2, Anxa4, Mro, Ephb1, AW549542, Irx3, EG434197, Frmpd1, Ptges, Acaa2, Cryab, Irf1, Lats2, Cebpa, Ttyh2, Chst11, Arhgdig, Dtx4, Sico2b1, Mypn, Megf10, Tob1, 4931408C20Rik, Cue dc1, Sh3glb1, Samd4, H2- T10, Hnf4a, Hspa4l, Grap, Id1, Flnc, Plekhg3, Cmpk2, Nfkb1a, Itgb3, Smad6, Crabp2, 2310010M24Rik, Acot12, Morn1, Comp, Tgfb1i1, Cdc42ep1, Adssl1, Ihh, Ablim1, Gata4, 2310008N 11Rik, Tiam2, Krt8, Ankrd1, Isl1, Angpt1, Ppp1r3b, Cd300e, Dbn1, Mdfic, Plekhg2, Aldh1a3, Thbs1, AB041803, Optn, Ng23, Acta2, Mdga1, Unc5b, Rbm24, Rhobtb2, Ngr, Itga3, Msx1, Zf p516, Lsp1, Csrp1, Fzd1, Slc37a2, 4933427D06Rik, Pycr1, Moscc2, Adamts8, Cbfa2t3, Foxn4, Tle3, Scrn1, Tdrd7, Olfml2b, Spsb1, Ypel5, Gstm5, Nbl1, Kcnf1, Hdac5, Mc1r, Dhrr3, Bcl6, Lama2, Hs6st1, Mrgpre, Nfam1, Gm672, Pitx3, Myom3, Lhfp, Wnt3a, Man1c1, Mcam, Fyn, Tmem119, Micalcl, Tmcc2, Kif1a, Ubash3b, Ap3m2, Hrh3, Coro2b, 5730557B15Rik, Hoxc4, R in3, Hhipl1, Hoxa1, Lrig1, Ltb, Vash1, Hgd, Cbr3, Btrc, Tgfbr2, Mamdc2, Tbx4, Nes, Pthr1, Dmrt2, 2610301F02Rik, Lrrc20, Tpm2, Fes, Arhgap24, C130089K02Rik, Col16a1, Cldn23, Ga dd45g, Agrn, Lmx1b, Kbtbd11, Rhbq, Trio, Gpc1, Cntln, Leprel1, B930049P21Rik, 2900057B20Rik, Psap, Col4a1, Cyp26c1, Maf, Anks6, Serinc2, Plxna2, Pde5a, Trim7, Mt4, Vgll3, Gprc 5a, Nsg2, Atp1a2, Acpp, Ccond3, 4921511C10Rik, Bace2, Plekha2, Ptpn13, Gata6, G0s2, Sfi1, Iqck, Rel, Hes1, Amotl1, Serpinh1, Ak1, Galns, Mex3b, Pgm5, Btbd11, Gsst3, Bahd1, Slc22 a23, Lrrfp1, Ddr1, Card10, Htra4, Ptpn21, Wipf1, Ifne1, Zdhhc2, Cacna1s, D8Ert82e, Atp2b4, Apobec2, D4Bwg0951e, Ablim2, Hpgd, Rbm20, Pdlim3, Gprc5c, Pink1, Trib1, Spp1, Rbm 47, Pfk, 1810015C04Rik, Cd83, Cdx2, Hdac11, Proc, Atp2c2, Nupr1, Tbc1d8, Shb, A4galt, Rapgef2, Tmem16f, Map3k6, Prdm1, Lrrc27, Tmem154, Krt9, Saa2, Phf19, Ryr1, Ccr7, Tspa n32, Lix1, Nedd9, Cd9, Ttc7, Gngt2, Dusp10, Tuba3a, |
| Sfpi1  | Induction | 1 | 259 | Nod2, Mmp9, Sfpi1, Gbp6, Il20ra, Coro1a, Gbp3, Irf5, Clec4a1, Slc9a9, Trim30, Slc9a7, Hoxb13, Lyn, Ptpn18, Gcm1, Prr15, Dyrk4, Cbfa2t3, Irf2, Cd52, Extl1, Heg1, Arhgap9, Plac8, Oasl2 , Scn2b, Rassf5, Tnfrsf13b, Apbb1ip, Gbp5, Cebpd, Mesdc1, Erg, Lonrf1, Ncf2, Sync, Gbp1, Igfbp4, Itsn1, Lmo2, Unc93b1, Rbm47, Psm8, Lyl1, Thbd, Mylc2pl, Gbp2, Gch1, St8sia1, Agp at9, Tapbp, Arpc1b, Myo18a, Nfam1, Ubash3b, Fbp1, Fgr, Mgat4b, Cd82, Ak3l1, Mapkapk2, Gsg1, Psm8b, N4bp2l1, Clec12a, Acpp, Ckb, Gfi1b, Rin3, Hmx2, A930008G19Rik, Tap2, Ra sl10a, Stambpl1, Rgag4, Gas7, Meis1, Ube1l, Ccbl2, Ptpn13, Phlda1, Sip1, Rbm43, Ctsc, Vim, Sash3, Dock2, Pde2a, Lrmp, Lst1, Thsd1, Lycat, Tlr4, Sh2b3, Mrv1, Hlx, Lats2, Rnf7, Bin2, Irgm, Abi3, Irf1, Ptgs1, Capg, Sepp1, Mmd, Cmtm7, Trim16, Tmem181, Gng12, Rel, Gpr114, B930018H19, Nfkbie, Sifn2, Cd274, Alox15, Slamf9, Tgfbi, Il21r, Rac2, Hdc, Pik3r5, Abcg1, N coa3, Itgax, Prdx6, Pdlim2, Spata6, Bcl6, Dll4, Ampd3, H2- T10, Aldh1a2, Il7, Creg2, Tnfsf9, Cst7, Rap1a, Mppe1, Sifn9, Map3k8, Pik3cd, Rnpep, Alox5ap, Rgs14, D730003K21Rik, Pqlc1, Ptgir, Gnai2, Vav1, Rassf3, Mkl1, Aff1, Tmem86a, Lipe, Il6 ra, Tg, Picalm, Gm347, Chst1, Ptpn7, Adora2a, Msrb3, Tph2, Nkain3, Cmtm3, Tgfbr1, Elk3, Rnasel, Rhoq, Igtp, Tnfai8l2, Tnni2, Angpt1, Osbpl3, Dusp4, Hspb7, Chr4, Smarca2, Hspa1 a, Entpd1, Ndr1, Fcgr2b, Id3, Ifne1, Bcl2l11, Ptpre, Ly6e, Pik3r1, Limd2, Steap3, Arhgap27, Add3, D330017J20Rik, Plcg2, Cd79b, Eif2c4, Inpp1, Tm6sf1, Rassf2, Zfp36l2, Rhpn2, Spsb4 , Eif4, A530032D15Rik, Rhobtb2, Fes, Gramd3, Itgb2, Cd97, 4631426J05Rik, Slamf6, Pkn1, H2afy, Pdck1ip1, Fli1, Bst2, Padi2, Itpkb, Fyn, Sp110, Tnfrsf26, Rnf19b, Socs3, Csk, Cpeb2, Kcne3, Fkbp1b, Klf13, Alpk1, Casp8, Fut4, Fgd2, Ikbke, Hrb1, P2rx7, Pon2, Ciita, Acadl, Echdc3, Xist, Rps6ka4, Traf5, Foxd2, Foxr1, Dtx3l, Atp1b3, Ppp1r9b, Trim25, Cotl1, Ptk2b, Tbc1d1 4, Vps18, Car7, Acot2, Fgfr4, Pik3ap1,                                                                                                                                                                                                                                                                                                                                                                                                                                                                                                                                                                                                                                                                                                                                                                                                                                                                                                                                                                                                                                                                                                                                                                                                |
| Pou5f1 | Knockdown | 1 | 76  | Tbx15, Dpf3, Hs3st3b1, Bcor, Wnt7b, Foxa2, Sypl2, Itga1, Col25a1, Cdx2, Msx2, Ptch1, Fgfr2, Fuca2, Rragd, Cxcl14, Scnn1a, Kctd15, Sez6, Irf6, C130089K02Rik, Id2, Cbx8, Rgma, Prox 1, Cdkn1c, Gsx2, Cd24a, Gadd45g, Pde8a, Hhipl1, Tgfbr3, Lipg, Zmiz1, Prickle1, Grina, Gchfr, 2210408F21Rik, Setd7, Tcfap2b, Tnfrsf1a, Zbtb16, AW548124, Eomes, Rtn4r1, Ascl2, H oxb13, Akt3, Rhpn2, Cbx4, Lrp2, Ccdc33, Id3, Npas4, Hsd11b2, Gipc2, Lrrc8e, Zfp503, Tmem22, Arl4c, Cuedc1, Hhip, Efnb2, Gsc, Hoxa1, Fos, Lyn, Maf, Amfr, Hoxb4, T rio, Nefl, Sfi1, Sem a6a, Sox9, Espn,                                                                                                                                                                                                                                                                                                                                                                                                                                                                                                                                                                                                                                                                                                                                                                                                                                                                                                                                                                                                                                                                                                                                                                                                                                                                                                                                                                                                                                                                                                                                                                                                                                                                                                                                                                                                                                                                                                                                                                                                                                                                                                                                                                                                                                                                                                                                                                                                                                                                                                                                                                                        |
| Sox2   | Knockdown | 1 | 93  | Casc1, Hspa12a, Id3, T, Cdkn1c, Wnt3, Krt7, Pitx2, Plekha2, Foxa2, Ephb1, Msx1, Scnn1a, Tmem22, Gpr103, Dkk1, Sgce, D430015B01Rik, Cdx1, Kif21a, Clic5, Wnt8a, Ier5, Rgma, Pm p22, Xpnp2p2, Hs6st2, Frmpd1, Prtg, Cda, Chst1, Arl4c, Zfp503, Slc6a7, Abhd9, Nkx2- 2, Sfmbt2, Sertad4, Galr2, Plcl2, Itga1, Sez6, Setd7, Jun, Slc9a2, Itgb8, Heg1, Lefty1, Eif4e3, Grip1, Zfp608, Rhou, Hhipl1, Lrrc8e, Sdc3, Tmc7, Tec, Id1, Dok5, C130089K02Rik, Prickle1, Fgfr2, Msx2, Acox2, Mafb, Ccdc33, Amfr, Tnfrsf1a, Nt5e, Hgsnat, Hesx1, Mex3b, Serpinh1, Irx3, Slc7a8, A630091E08Rik, Tnfrsf14, Flt1, Speg, Ctdspl, Rbm20, 4631426J05Rik, Lmod3, Krt8, Lpp, Unc5b, Epp4. 1l1, Atnx1, Hip1, Slco2a1, Gpsm1, Dlx6os2, Hoxa1,                                                                                                                                                                                                                                                                                                                                                                                                                                                                                                                                                                                                                                                                                                                                                                                                                                                                                                                                                                                                                                                                                                                                                                                                                                                                                                                                                                                                                                                                                                                                                                                                                                                                                                                                                                                                                                                                                                                                                                                                                                                                                                                                                                                                                                                                                                                                                                                                                                             |

|          |           |    |     |                                                                                                                                                                                                                                                                                                                                                                                                                                                                                                                                                                                                                                                                                                                                                                                                                                                                                                                                                                                                                                                                                                                                                                                                                                                                                                                                                                                                                                                                                                                                                                                                                                                                                                                                                                                                                                                                                                                                                                                                                                                                                                                                                                                                                                                                                                                                                                                                                                                                                                                                                                                                                                                                                                                                                                                                                                                                                                                                                                                                                                                                                                                                                                                                                                  |
|----------|-----------|----|-----|----------------------------------------------------------------------------------------------------------------------------------------------------------------------------------------------------------------------------------------------------------------------------------------------------------------------------------------------------------------------------------------------------------------------------------------------------------------------------------------------------------------------------------------------------------------------------------------------------------------------------------------------------------------------------------------------------------------------------------------------------------------------------------------------------------------------------------------------------------------------------------------------------------------------------------------------------------------------------------------------------------------------------------------------------------------------------------------------------------------------------------------------------------------------------------------------------------------------------------------------------------------------------------------------------------------------------------------------------------------------------------------------------------------------------------------------------------------------------------------------------------------------------------------------------------------------------------------------------------------------------------------------------------------------------------------------------------------------------------------------------------------------------------------------------------------------------------------------------------------------------------------------------------------------------------------------------------------------------------------------------------------------------------------------------------------------------------------------------------------------------------------------------------------------------------------------------------------------------------------------------------------------------------------------------------------------------------------------------------------------------------------------------------------------------------------------------------------------------------------------------------------------------------------------------------------------------------------------------------------------------------------------------------------------------------------------------------------------------------------------------------------------------------------------------------------------------------------------------------------------------------------------------------------------------------------------------------------------------------------------------------------------------------------------------------------------------------------------------------------------------------------------------------------------------------------------------------------------------------|
| Nanog    | Knockdown | 1  | 233 | Wt1, Ephb1, Coch, Il20ra, Msx1, Pcdh8, Gata6, Fgf5, Akr1c14, Sez6, Irx5, Pdgfra, Pou3f3, 5033426E14Rik, En1, Zfp608, Spon1, Dkk1, Sema6a, Ifit1, 9030613N10Rik, Grhl2, Efnb2, Dup4, Slc35d3, Mab211l, Cachd1, Dlx2, Nkx2-2, Irx3, Foxd4, Bcl11a, Klf21a, Ptptr, Ccno, Rxrg, Foxa2, Cxcl12, Sync, Lrp2, Ror1, Gadd45g, Tbx18, Lef1, Slc9a2, Crisp1d1, Sox7, Id1, Arpp21, Cdh2, Tcerg11, LOC227885, Itgb8, Sp8, Wnt3, Id3, Hs6st2, Dpyd, Trim36, Fbp1, Robo3, E530001K10Rik, B930011P16Rik, Fgf15, Scel, Fgfr2, Arg2, Tgfb2, Otx2, Id2, Ier5, Dnmt3b, Trib2, Nkx2-9, Ebf2, Maf, D030018L15Rik, 2310010M24Rik, Gata3, Krt8, Itga1, Ptpn14, Hnt, Wnt8a, Chst1, Epha1, Gdf6, Zic2, Tmcc3, Podxl, Tmem22, Stard13, Kcnj9, Tmem90a, Serinc5, Asb4, Prss23, Meis1, Mafb, Inadl, Tnfrsf19, Atf3, Flt1, Hoxa1, Pax3, Pmp22, Snai1, Gja1, Ptpz1, Lats2, Npal2, Hoxb1, Pmaip1, Ovol1, Kctd16, Cdx2, Cyp24a1, Crb2, Mmp25, Ddit4l, Pik3r1, Fras1, Gpr177, Msx2, Pou4f3, Creb5, Ptprb, Gsx1, Atxn1, Wnt16, Otop1, Phactr1, Igsf11, Crlf1, Six3, Cacna2d1, Elnf1, Avpr1a, Clic5, Zfp503, Kl, Syt17, Mycn, Prom1, Tbx4, Ddit4, Hmga2, Trio, Ets1, A930009N24, Phlda3, Meis2, Klf6, Ercc4, Igf2, Dll4, Slc25a24, Dcc, Pitx2, Zswim6, Prickle1, Tas1r2, Lonrf1, Sgce, Plcg2, Bmi1, D330037F02Rik, Ptpns, Gnas, Has1, Jun, Tnfrsf10, Ovol2, Trib1, Eya2, Rb1, Palld, Fezf1, Kcng3, Lmo4, Pcdh7, Nes, Rarres1, Bcor, Kitl, Hoxd13, Asb13, Atoh1, Popdc3, 3110007F17Rik, Lphn2, Nt5e, Dlx6os2, Sv2c, Commd3, Ccnd2, Eml1, Lhx2, P4ha2, Emx2, Rbm20, Sertad4, Jph2, Cd24a, Pkia, Pcdh19, Rapgef1, Pdlim3, Ptgs2, Pdzm4, Thbs4, Cald1, 4631426J05Rik, Dsp, Zbp1, Cyr61, Glis3, Ankrd6, Dst, Egr2, Sox13, Gm98, Cttdspl, Alox5, Nostrin, Isl2, Lix1, P2ry5, Casq2, St8sia3, Irs2, Slc22a23, Myc,                                                                                                                                                                                                                                                                                                                                                                                                                                                                                                                                                                                                                                                                                                                                                                                                                                                                                                                                                                                                                                                                                                                                                                                                                                                                                                                                                                                                                                                         |
| Pou5f1   | Induction | -1 | 0   |                                                                                                                                                                                                                                                                                                                                                                                                                                                                                                                                                                                                                                                                                                                                                                                                                                                                                                                                                                                                                                                                                                                                                                                                                                                                                                                                                                                                                                                                                                                                                                                                                                                                                                                                                                                                                                                                                                                                                                                                                                                                                                                                                                                                                                                                                                                                                                                                                                                                                                                                                                                                                                                                                                                                                                                                                                                                                                                                                                                                                                                                                                                                                                                                                                  |
| Sox2     | Induction | -1 | 0   |                                                                                                                                                                                                                                                                                                                                                                                                                                                                                                                                                                                                                                                                                                                                                                                                                                                                                                                                                                                                                                                                                                                                                                                                                                                                                                                                                                                                                                                                                                                                                                                                                                                                                                                                                                                                                                                                                                                                                                                                                                                                                                                                                                                                                                                                                                                                                                                                                                                                                                                                                                                                                                                                                                                                                                                                                                                                                                                                                                                                                                                                                                                                                                                                                                  |
| Nanog    | Induction | -1 | 0   |                                                                                                                                                                                                                                                                                                                                                                                                                                                                                                                                                                                                                                                                                                                                                                                                                                                                                                                                                                                                                                                                                                                                                                                                                                                                                                                                                                                                                                                                                                                                                                                                                                                                                                                                                                                                                                                                                                                                                                                                                                                                                                                                                                                                                                                                                                                                                                                                                                                                                                                                                                                                                                                                                                                                                                                                                                                                                                                                                                                                                                                                                                                                                                                                                                  |
| Tcf3     | Induction | -1 | 399 | Nr5a2, Slc28a1, Gsta3, Mcf2, Spic, Glod5, Zfp371, Ooep, Ntn1, Gm1967, Mup4, Notum, LOC436089, Ttn, Trh, Btla, Morc1, Ttpa, Gm525, Mup5, Tdh, Abcb5, Eras, Rshl3, Cyp4f14, Foxd3, Apod, Ccno, Rxrg, Akr1c18, Zic3, Kis2, Ptger2, Jam2, Slc5a11, Enox1, Gjb1, Osm, Ephx2, Zfp819, Igkv4-90, Tdrd12, Fzd10, Slc15a1, Slc13a4, Spats1, Gli2, Wnt8a, Klf2, Zmat4, 4930434E21Rik, 2010204N08Rik, Capsl, EG328314, Tcea3, Sp5, 2410088K16Rik, Hoxb1, Manba, Blnk, Slc7a3, Ddx58, Scgb3a1, Cnpy1, Lrrc34, Gm1631, Fbxo15, Sh2d1a, Nt5e, EG434197, Pim2, Pla1a, Slc6a15, Pdcl2, Zyg11a, Col14a1, Trim2, Cobl, Dppa5a, Dppa3, Grhl2, 1810054D07Rik, Epb4.9, Coch, A830018L16Rik, Gabra1, Gm1679, Sall3, Jmjd2c, 1700121N20Rik, Gpr160, Lef1, Nanos3, Ubxd4, Sncg, Dusp27, Frmd4a, Triml2, Fut9, Casq2, Cysl1r1, Fzd5, Cyp4f15, 1700019D03Rik, Prdm14, Lgals12, Rasgrp1, Nanog, 9330199F22Rik, Rif1, Ddc, Mf2, Mkrr1, Glt1d1, 4932412D23Rik, Myb, Tm7sf4, Mycn, Ebf1, Fgf4, Sash1, Ccrl1, Ifitm1, Dnmt3b, Kcnk5, Cyp2j13, Sh3gl2, Slc1a3, Zfp72, Pdggc, Tubb2b, Cpsf4l, Crisp1d1, Bnc2, 2410152P15Rik, Dmrt1, Atp10a, Dapp1, Ncl, Klf4, Cpne5, Ccdc138, Ppp1r9a, Rpp40, Rragd, Elmo1, Pdk1, Pcaf, Rage, Ckap4, Hist1h4d, Lix1, Elavl2, Tnfrsf19, D12Ert553e, Dcbl1, Prdm1, Gbx2, Prlr, C78283, Papalb, Zfp273, Tns3, Serbp1, Tdggf1, Zic5, Gm428, Zfp532, Pitpnc1, A1427809, Enpp3, Otx2, Zbtb2, Gja1, Tmem8, Kctd16, D14Abb1e, Prdm5, Epha1, Eed, Hmgb2l1, Sox13, Pax6, A930001A20Rik, 4833422M21Rik, BC053440, Tcfcp2l1, Prr6, Yipf7, Anp32a, Slc7a7, L1td1, Ppp2r5c, EG244495, Sycp1-1, Cacybp, Sap30, Pipox, Dapl1, B4galt6, Trim24, Zfp677, Etv5, Arl4a, F2r1l, Mnd1, Cep55, Arhgef3, Lifr, Gdf3, Smarcd1, Tbc1d9, Qser1, Mllt6, Irak3, Spp1, Dppa2, Zfp57, Gtlf3a, Fgr, Acs15, Alg13, Alpl, Syt3, Jarid2, 3732407C23Rik, Xrn2, Gna14, Pfdn1, A230083H22Rik, Dnajc19, Sulf1, Terf1, Fbxo22, Klf9, Rfx2, Gfpt2, B3gnt7, Pvt1, Sox2, Rmnd5b, Enah, Foxn2, Fbxo36, Ina, Rpl22l1, Elavl4, Phc1, Tera, Cdc37l1, Snapc3, Tgif1, Mbip, Nufip2, Vcan, 9130209A04Rik, Usp7, Frem2, Has2, Dennd2c, Nsd1, Tmf1, Hsd17b14, Gpa33, Mobp, Acsbg2, Vegfc, Rarres1, En1, Myh13, Yes1, Cml4, Plcx1d1, Pcsk6, Tnfrsf11, Ildr1, Lrrn2, Il17b, Ifitm7, Tfdp2, Acp6, Sept1, Ndg2, A830025M08, Mapt, 9430078K24Rik, Psat1, Il7, Cdca7, 2810021B07Rik, Myst4, Sntb2, Pabpc3, C230088H06Rik, Ccnc, Socs2, A230028O05Rik, 4930444G20Rik, Dock2, Ppp2r2d, Cachd1, Mitf, Enoph1, Odz4, Ms4a10, Arpp21, Casc4, Rcor2, Fgf1, Gtf3c3, Msh6, Ttc25, Cyp7b1, Gramd1b, Runx1t1, Dhrs7, Prrg4, Ankrd35, Znf2, Ccdc3, Slc25a40, Rab11fip4, Adam23, Nup205, Esrrb, Zbtb45, Mybl2, Mreg, Rit2, Utrn, Cdk4, Nmnat2, Morc3, Tle4, C230037E05Rik, H2afz, Dido1, Rpl7l1, Rerg, Ctbp2, Nlrc4, Nr0b1, Slc5a1, Akr1b8, Apln, Acss1, 1700049E22Rik, Tmhs, Gfod1, Armcx1, Kif18a, C330048F19, Mrps31, Slc37a1, Itpk1, Patz1, Gjc1, Cd2, Twf2, Spry4, Nodal, Cbfa2t2, Shf, 2410004N09Rik, Upp1, Rfc5, Mog, Tbc1d15, Slc35f2, Twistnb, Bst2, Mtss1, Snrpn, Zcchc10, St8sia1, Atic, Lamc1, Pecam1, 0610039H22Rik, B430203I24Rik, Oc90, Tmem29, 1700071K01Rik, Hps3, Upk1a, Acot1, Vwf, Ceacam19, Naprt1, I0C0044D17Rik, Ralgps2, Cenpm, Rhcg, Tmem17, Bard1, Arl4d, Atf7ip, Rarg, Rps8, |
| Klf4     | Induction | -1 | 128 | Lbxcor1, Dll1, Grm6, Lef1, Ccno, Trim36, Pax6, Zic5, Zic2, Car4, Tdrd5, Myb, Sema6a, Otx2, Upp1, Grhl2, Tmem54, Meg3, Tbc1d9, Dnmt3a, Jph1, Atp10a, Kctd19, Camkv, Slc39a8, Jph4, Gstt2, Tmem74, Wdr86, Meis2, Ahrr, Dll4, Artt, Ifngr2, Otop1, Atp12a, Chrna5, Efcab4a, Pou3f1, Myo10, Dtx4, Sp5, Cdh3, Bcl11a, Zhx1, Mpp3, Icosl, 2310045A20Rik, Rgs16, 2310026E23Rik, Dmrt1, Meig1, Msx1, Cdk11, Knndc1, Slc5a5, Dleu7, Ankrd6, Tppp, Hoxb13, Psd3, Lrrn1, Cdh2, Prr15, Spock2, Nrcam, Nope, Fgf15, Usp44, Gnb4, Pm20d2, Nav2, Cldn1, Slc43a1, Wnt8a, Hdac11, Cgnl1, Snai3, Colec12, Klc3, Clgn, Per2, Mcoln3, Gbx2, Efnb2, Rbm35a, Slc22a23, Il7, Dusp10, Dab1, Mfap3l, Cldn7, Plcg2, Sox4, Gnao1, Eif4e3, Rprm, Arl4c, Ddr1, Epha7, Met, Lypd6, Vwa2, Nes, Sox12, Paqr8, St6gal1, Klf2, Bst2, Ccdc85a, LOC436089, Sulf1, 9130401L11Rik, Mycn, Rab19, Gm525, Gdap11l, Xkr5, 4833422M21Rik, Etv6, Rab34, Cpn e9, Cdk6, Rev1, Lifr, Vwf, Pla2g10, Chd7,                                                                                                                                                                                                                                                                                                                                                                                                                                                                                                                                                                                                                                                                                                                                                                                                                                                                                                                                                                                                                                                                                                                                                                                                                                                                                                                                                                                                                                                                                                                                                                                                                                                                                                                                                                                                                                                                                                                                                                                                                                                                                                                                                                                                                                                                        |
| Tcfcp211 | Induction | -1 | 48  | E330037M01Rik, Irx3, En1, Gabra1, Egr2, Zfp608, Fgf5, Gfra1, Msx1, Egr4, Hoxb4, Cds1, Isl2, Efnb2, Foxa1, Mfsd2, Id2, Adra2a, Msx2, Id3, Dusp26, Gata3, Cyp24a1, Atoh1, Pitx2, Efh1, Zic1, Galnt14, Pthr1, March1, Mafb, Pcdh8, Cdkn1c, Ap3b2, Agpat9, Bcl11a, Ank, Sertad4, Pde5a, Fgf15, Lad1, Sall3, Rtn4r1l, Dcl1, Sema4c, Tead3, Myb, Yaf2,                                                                                                                                                                                                                                                                                                                                                                                                                                                                                                                                                                                                                                                                                                                                                                                                                                                                                                                                                                                                                                                                                                                                                                                                                                                                                                                                                                                                                                                                                                                                                                                                                                                                                                                                                                                                                                                                                                                                                                                                                                                                                                                                                                                                                                                                                                                                                                                                                                                                                                                                                                                                                                                                                                                                                                                                                                                                                 |
| Cdx2     | Induction | -1 | 0   |                                                                                                                                                                                                                                                                                                                                                                                                                                                                                                                                                                                                                                                                                                                                                                                                                                                                                                                                                                                                                                                                                                                                                                                                                                                                                                                                                                                                                                                                                                                                                                                                                                                                                                                                                                                                                                                                                                                                                                                                                                                                                                                                                                                                                                                                                                                                                                                                                                                                                                                                                                                                                                                                                                                                                                                                                                                                                                                                                                                                                                                                                                                                                                                                                                  |
| Myod1    | Induction | -1 | 6   | Sim2, Avpr1a, Nefm, Nt5e, Lef1, Nrp2,                                                                                                                                                                                                                                                                                                                                                                                                                                                                                                                                                                                                                                                                                                                                                                                                                                                                                                                                                                                                                                                                                                                                                                                                                                                                                                                                                                                                                                                                                                                                                                                                                                                                                                                                                                                                                                                                                                                                                                                                                                                                                                                                                                                                                                                                                                                                                                                                                                                                                                                                                                                                                                                                                                                                                                                                                                                                                                                                                                                                                                                                                                                                                                                            |
| Sfp1     | Induction | -1 | 0   |                                                                                                                                                                                                                                                                                                                                                                                                                                                                                                                                                                                                                                                                                                                                                                                                                                                                                                                                                                                                                                                                                                                                                                                                                                                                                                                                                                                                                                                                                                                                                                                                                                                                                                                                                                                                                                                                                                                                                                                                                                                                                                                                                                                                                                                                                                                                                                                                                                                                                                                                                                                                                                                                                                                                                                                                                                                                                                                                                                                                                                                                                                                                                                                                                                  |

|        |           |    |     |                                                                                                                                                                                                                                                                                                                                                                                                                                                                                                                                                                                                                                                                                                                                                                                                                                                                                                                                                                                                                                                                                                                                                                                                                                                                                                                                                                                                                                                                                                                                                                                                                                                                                                                                                                                                                                                                                                                                                                                                                                                                                                                                                                                                                                                                                                                                                                                                                                                                                                                                                                                                                                                                                                                                                                                                                                                                                                                                                                                                                                                                                                                                                                                                                                                                                                                                                                                                                                                                                                                                                                                                                                                                                                                                                                                                                                                                                                                                                                                                                                                                                                                                                                                                                                                                                                                                                                                                                                                                                                                                                                                                                                                                                                                               |
|--------|-----------|----|-----|-------------------------------------------------------------------------------------------------------------------------------------------------------------------------------------------------------------------------------------------------------------------------------------------------------------------------------------------------------------------------------------------------------------------------------------------------------------------------------------------------------------------------------------------------------------------------------------------------------------------------------------------------------------------------------------------------------------------------------------------------------------------------------------------------------------------------------------------------------------------------------------------------------------------------------------------------------------------------------------------------------------------------------------------------------------------------------------------------------------------------------------------------------------------------------------------------------------------------------------------------------------------------------------------------------------------------------------------------------------------------------------------------------------------------------------------------------------------------------------------------------------------------------------------------------------------------------------------------------------------------------------------------------------------------------------------------------------------------------------------------------------------------------------------------------------------------------------------------------------------------------------------------------------------------------------------------------------------------------------------------------------------------------------------------------------------------------------------------------------------------------------------------------------------------------------------------------------------------------------------------------------------------------------------------------------------------------------------------------------------------------------------------------------------------------------------------------------------------------------------------------------------------------------------------------------------------------------------------------------------------------------------------------------------------------------------------------------------------------------------------------------------------------------------------------------------------------------------------------------------------------------------------------------------------------------------------------------------------------------------------------------------------------------------------------------------------------------------------------------------------------------------------------------------------------------------------------------------------------------------------------------------------------------------------------------------------------------------------------------------------------------------------------------------------------------------------------------------------------------------------------------------------------------------------------------------------------------------------------------------------------------------------------------------------------------------------------------------------------------------------------------------------------------------------------------------------------------------------------------------------------------------------------------------------------------------------------------------------------------------------------------------------------------------------------------------------------------------------------------------------------------------------------------------------------------------------------------------------------------------------------------------------------------------------------------------------------------------------------------------------------------------------------------------------------------------------------------------------------------------------------------------------------------------------------------------------------------------------------------------------------------------------------------------------------------------------------------------------------|
| Pou5f1 | Knockdown | -1 | 674 | Gm525,Gm1967,Mup4,Enox1,Neurod1,Inhbb,Mcf2,Lefty1,Slc28a1,Pdyn,LOC436089,Nr0b1,Gbx2,Dll1,Vegfc,Slc7a3,Zic3,Tnfsf11,Nkx6-3,Zmat4,Dusp27,Ripply1,Ccno,Dpp4,1700019D03Rik,C130034118Rik,Pdzd4,Odz4,Tcl1,Insm1,Ttpa,Cyp11a1,Sfrp4,Slc5a11,Adam23,Trh,Foxd3,Ooep,Camkv,Gm428,Fgf15,Enpp3,Scgb3a1,Ttn,Slc47a1,Jam2,Fut9,Lbxcor1,Apod,Cnpy1,Pou5f1,Gsta3,Dab1,Cobl,Trp73,Pax6,Pitpnc1,Sema5b,Rxrg,Epha2,Lrrn2,Cyp4f14,Sult6b1,Fbp1,Myb,Slc5a1,Socs2,Stat4,2410088K16Rik,2410152P15Rik,Zic5,9130401L11Rik,Nmnat2,Abcb5,Lefty2,Phc1,Zfp819,Myo1g,Hsd17b14,Tmprss11d,Manba,Pabpc3,Fzd5,Stmn2,C330004M20Rik,Spns3,Pla1a,Dpys,Gm1679,Ms4a10,Tdgif1,Slc7a7,Tcf15,L1td1,Trps1,Cyp3a13,Nodal,6332401O19Rik,Dppa5a,Prdm5,Fgf4,8430430B14Rik,Exoc3l,D730003K21Rik,Prmt8,Slc1a3,Gjb1,I17d,Foxp1,Upp1,Rnf125,Cdyl2,4932412D23Rik,Pdcl2,Mfng,Coch,C330048F19,Gm1631,Lef1,Ndufa4l2,Otx2,Igfbp1,Camk1d,Hpca,Trim2,T,Etv4,Gpa33,Liph,Gad1,D1pas1,Rarg,Nt5e,Xkr5,Pla2g4e,Gabra1,Aire,Zfp296,Ccdc113,Slc43a1,Trpm1,Parp14,Zfp371,Mcsm,Sfrp1,Sall3,Ddx58,Mtss1,Zbp1,Lrrc2,Gm867,Gpr1,Slc12a8,Gli2,Ptprj,Meox1,Cth,5033426E14Rik,Fhod3,Sept1,Eps8,Zfp42,Ntn1,Slco4a1,En2,Cbr3,Spats1,Usp28,Eli2,Wnt3a,Cd37,Iifitm3,Slc35f2,Adamts1,Cyp2b23,Tspan32,Slc6a15,Tm7sf4,4930432N10Rik,Pcaf,Tmc5,Klf5,D12Ertdd553e,Rex2,Tcea3,Fbxw10,Bst1,Ttyh1,Parp12,Dapp1,Wscd1,Ngfr,EG328314,A1427809,Kcnq2,Zfp532,Nostrin,Olig3,Klf2,9330199F22Rik,Hsd17b11,Atcay,Ltbp4,Sap30,Gfpt2,Zfp57,Otx2os1,Cnga3,Acsbg2,Gtlf3a,A430010J10Rik,Fblim1,D16Ertdd472e,1810054D07Rik,Cep55,Ctbp2,Gcm2,Sulf1,Hspb3,Ccdc3,Matn3,Camk2b,Scgb1c1,Dcbld1,Rragb,Crmp1,Timp4,Piwil4,Sox12,Elavl2,Elavl4,Camk2n1,Arc,Gm216,Nid2,Jag1,Lgr4,Arl4a,Pipox,Utf1,Hormad2,A230055J12Rik,EG620393,Vstm2l,Oit1,Chd9,Tex21,Art1,Slc39a14,Dclk2,Naprt1,Snta1,Lin28b,Tff3,Inpp5d,Lonrf2,Mreg,Slc25a36,Mkrm1,Fzd10,Gjc1,Rcor2,Irak3,Enah,Dlgap3,Etv1,Notch4,Pigl,Pecam1,Porcn,Rbpms2,Serpini1,Col13a1,Zfhx2,Mycn,Rest,Nptx2,Cpsf4l,Cdk6,2210417A02Rik,Kcnu1,Eed,Tmem179,A830025M08,Tmem145,Zscan10,Esrrb,Sntb2,Bai1,C78283,Centa1,4930449E01Rik,Speer7-ps1,Tsx,Wnt8a,Atf7ip,Grtp1,Polr3gl,Spred1,Zbtb2,Tera,Plekhhg1,Fgf10,Rbmxl2,Gm98,Cga,Acp6,Pde1b,Dock2,A730049H05Rik,Zap70,Sh2d4b,Igfsf21,Tmhs,0610039H22Rik,Capsl,Papalb,Sirt1,Etv5,Etaa1,Ncam1,Tdh,Pvt1,Lrrn3,Cryba1,Tbc1d21,Tnfrsf1b,Apoe,Setx,Esam1,Dennd2c,Gdf3,Atp1b2,Smtnl2,Ttc25,Slc7a9,Dnajc6,Nf2,Higd1b,Hap1,Plekhhm1,Akr1b8,Krt42,Trim36,Mypn,Car3,Phf15,Ankrd35,Hes6,Ilf7,Ephx2,Morc1,Jmjd2c,Mcl1,Fbxo15,Msln,Mgmt,Batf,Runx1t1,Nope,A530088H08Rik,Cacybp,RP23-149D11.5.9430078K24Rik,Dopey2,Mfap5,Arl4d,Sox1,Nufip2,Meg3,Ier2,Pdgc,Cplx1,Col14a1,2900041M22Rik,Ldlrad3,Zfp428,Tor3a,Gpd2,Igll1,Ubr5,Rif1,Slc15a1,Arl15,Anxa11,Tspan5,A230083H22Rik,Mfi2,Sod1,Rage,I17rd,Atp10a,Igf2bp2,Sox2,Sncg,Fgf5,Cbfa2t2,Mtf2,Slc38a2,Myh13,Terf1,Hunk,Cachd1,Spire2,Ina,Mobkl2c,Txnip,Zfp219,Armcx1,Fgf1,EG665897,Lrch4,4933403G14Rik,LOC380850,Ric8b,Ak1,Cnmm2,Prdm14,1700049E22Rik,Inoc1,Trp53,Tnfrsf17,Zfp518b,Adora2b,1200015N20Rik,Evc,Ssr2,C230037E05Rik,Asxl1,Hk2,Tmem2,Schip1,Zc3h12a,Sh2d1a,Tfdp2,Mitf,Stoml1,Xaf1,Twf2,Rsbn1,Ptprk,Irf1,Sco1,A830018L16Rik,Slc29a4,Morc3,Pdhhb,Ubx4d,Rpp25,Gpt2,Gpr133,Cldn5,Jarid1b,Lemd1,Scarb2,Pla2g10,Ptp4a3,Triml2,Kif5b,Rassf10,Plekhhg5,Prr6,Tnk2,Slc29a1,Mllt6,Gdap1l1,Tbc1d9,Phf21a,Adrb1,Cdc42ep3,Enc1,Rbpj,Elmo1,B3gnt2,Gpx7,Ilf7b,Cd38,Sacs,Msi2,Dfna5h,Pla2g2c,Arntl,Pdk1,Ccr1,Rpap1,Xrcc5,Psat1,Cggbp1,Ggnbp1,Cdc37l1,Dscaml1,Parp1,Nfat5,Snapp3,Glod5,Itpk1,Apol7a,Rmnd5b,Rfx2,Spry2,Cdc2l6,Spred2,Nolc1,Iifitm2,Twistnb,Rfc5,Cdca7,Ncor1,Frmd4b,Slc3a2,2410004N09Rik,Spp1,Spry4,Thrsp,Aqr,Syt9,Meis2,Mup5,Ryr3,Aass,Spna1,Robo4,Spink3,Nlrc4,Gngt2,Vsig2,Dok2,Grp,Pllp,4631416L12Rik,Frmd4a,Usp44,Bnc2,Bcl11a,Ebf1,Hfe2,Ccnd1,Tmem45b,Nrxn1,Egfl6,Oas2,Popdc3,Tmem40,Kng2,Rerg,D18Ertdd653e,Chd5,Slc9a2,AW125753,Gpr135,Tdrd12,Asb4,Hells,Pml,Mtus1,Cradd,Tmprss12,Cd300e,Dtna,Yipf7,Jmjd1a,Iifitm6,Gpr160,Mep1b,Qser1,Calca,Irx6,Arpp21,Pim2,Rapgef4,Helb,Spag6,Rasgrp1,Aard,Esco2,Myc,Ankrd10,Cysltr1,Pice1,Kis2,Reln,Hopx,Aldh2,Pias2,Irgm,D4Ewg0951e,Gprc5b,Plekhhb1,Dip2c,Tmprss5,Skil,Crispld1,Tshb,Zdbf2,BC053440,Tle4,Cyp2j13,Ilf3,Gbp2,Lmo2,Akr1c12,Lphn1,Xab1,A530058O07Rik,Tpd52l1,Ddc,Rrn3,Mterf,Hecw1,Tmem8,D330037F02Rik,Chek2,Vwa3a,Zfp184,Tff1,Rhbg,Ilf27ra,Bahcc1,Zcchc3,Cyb5r1,Gls,4921511C04Rik,Clnk,Slc27a2,Gaint9,C130092O11Rik,Trim52,4933408N05Rik,Olf1r147,Iifitm7,Tcp112,Zfp11,Tmem45a,Pcyl1b,Kcnh8,Prok2,Csn3,Morc2b,Dmc1,Tm7sf3,Cebpd,C230088H06Rik,Akap11,Plcb4,Tcfap4,Cml4,Grm6,Insc,4930434E21Rik,Pcdh8,Cpvl,Ngsg2,Pnpla3,Fstl5,Calb2,Hoxb1,Pcolce2,Rtkn,Lrrc34,Arhgap30,Fgl2,Sox7,Itag9,Ptprt,Hlf,Duoxa2,Tmem121,Astn1,Zfp536,Foxa1,Mesp1,Cryba2,Nkx2-2,Dgkg, |
|--------|-----------|----|-----|-------------------------------------------------------------------------------------------------------------------------------------------------------------------------------------------------------------------------------------------------------------------------------------------------------------------------------------------------------------------------------------------------------------------------------------------------------------------------------------------------------------------------------------------------------------------------------------------------------------------------------------------------------------------------------------------------------------------------------------------------------------------------------------------------------------------------------------------------------------------------------------------------------------------------------------------------------------------------------------------------------------------------------------------------------------------------------------------------------------------------------------------------------------------------------------------------------------------------------------------------------------------------------------------------------------------------------------------------------------------------------------------------------------------------------------------------------------------------------------------------------------------------------------------------------------------------------------------------------------------------------------------------------------------------------------------------------------------------------------------------------------------------------------------------------------------------------------------------------------------------------------------------------------------------------------------------------------------------------------------------------------------------------------------------------------------------------------------------------------------------------------------------------------------------------------------------------------------------------------------------------------------------------------------------------------------------------------------------------------------------------------------------------------------------------------------------------------------------------------------------------------------------------------------------------------------------------------------------------------------------------------------------------------------------------------------------------------------------------------------------------------------------------------------------------------------------------------------------------------------------------------------------------------------------------------------------------------------------------------------------------------------------------------------------------------------------------------------------------------------------------------------------------------------------------------------------------------------------------------------------------------------------------------------------------------------------------------------------------------------------------------------------------------------------------------------------------------------------------------------------------------------------------------------------------------------------------------------------------------------------------------------------------------------------------------------------------------------------------------------------------------------------------------------------------------------------------------------------------------------------------------------------------------------------------------------------------------------------------------------------------------------------------------------------------------------------------------------------------------------------------------------------------------------------------------------------------------------------------------------------------------------------------------------------------------------------------------------------------------------------------------------------------------------------------------------------------------------------------------------------------------------------------------------------------------------------------------------------------------------------------------------------------------------------------------------------------------------------------|

|       |           |    |     |                                                                                                                                                                                                                                                                                                                                                                                                                                                                                                                                                                                                                                                                                                                                                                                                                                                                                                                                                                                                                                                                                                                                                                                                                                                                                                                                                                                                                                                                                                                                                                                                                                                                                                                                                                                                                                                                                                                                                                                                                                                                                                                                                                                                                                                                                                                                                                                                                                                                                                                                                                                                                                                                                                                                                                                                                                                                                                                                                                                                                                                                                                                                                                                                                                                                                                                                                                                                                                                                                                                          |
|-------|-----------|----|-----|--------------------------------------------------------------------------------------------------------------------------------------------------------------------------------------------------------------------------------------------------------------------------------------------------------------------------------------------------------------------------------------------------------------------------------------------------------------------------------------------------------------------------------------------------------------------------------------------------------------------------------------------------------------------------------------------------------------------------------------------------------------------------------------------------------------------------------------------------------------------------------------------------------------------------------------------------------------------------------------------------------------------------------------------------------------------------------------------------------------------------------------------------------------------------------------------------------------------------------------------------------------------------------------------------------------------------------------------------------------------------------------------------------------------------------------------------------------------------------------------------------------------------------------------------------------------------------------------------------------------------------------------------------------------------------------------------------------------------------------------------------------------------------------------------------------------------------------------------------------------------------------------------------------------------------------------------------------------------------------------------------------------------------------------------------------------------------------------------------------------------------------------------------------------------------------------------------------------------------------------------------------------------------------------------------------------------------------------------------------------------------------------------------------------------------------------------------------------------------------------------------------------------------------------------------------------------------------------------------------------------------------------------------------------------------------------------------------------------------------------------------------------------------------------------------------------------------------------------------------------------------------------------------------------------------------------------------------------------------------------------------------------------------------------------------------------------------------------------------------------------------------------------------------------------------------------------------------------------------------------------------------------------------------------------------------------------------------------------------------------------------------------------------------------------------------------------------------------------------------------------------------------------|
| Sox2  | Knockdown | -1 | 509 | <p>Inhbb,Gm1967,Nkx6-3,Slc7a3,Enox1,Scgb3a1,Tnfsf11,Pdyn,Cyp11a1,Dpp4,Tcl1,Ntn1,Vegfc,Ripply1,Manba,Pax6,Morc1,Trh,Dnajc6,Nr0b1,Spp1,Zmat4,Lrrc2,Pdcl2,Slc28a1,Ttpa,Gfod1,Krt42,1700019D03Rik,Gbx2,Notum,2410152P15Rik,Pdzd4,Edn2,Tmprss11d,Lrrc34,Spats1,Dpys,Jam2,Trim36,Neurod1,Tmprss5,Prmt8,Fut9,Slc6a15,C77370,Fgf15,Cyp3a13,EBf1,Mcf2,Cnpy1,Sult6b1,Myb,Dab1,Soep,Centa1,Cd2,Zfp819,EG328314,Sema5b,Pax8,Meox2,Foxd3,D14ErtD668e,Rnf125,Fzd5,Acsbg2,Pla2g4e,Lrrn3,Adam23,5830431A10Rik,Tdh,C330004M20Rik,Pga5,LOC436089,Insm1,Glod5,Tmc3,D1pas1,Trim2,Rapgef4,Cpsf4,Slc5a1,Gjb1,Gm1631,Klf2,Fblim1,Pcyl1b,Fgf4,Usp28,Ptprj,Chma9,Kng2,Cobl,Ms4a10,Sept1,Scgb1c1,Slc47a1,Sh3gl2,Nr5a2,Gpa33,Tns3,Porcn,Exoc3l,Cd300e,Sfrp4,Zfp42,4932412D23Rik,Nf2,Erns,D16ErtD472e,Hsd17b14,Pitpnc1,St8sia1,Dusp27,Ankrd35,Ndg2,Kng1,Fbp1,Irga9,Slc5a11,Alpk3,Apod,Chmp4c,Sh2d4b,Esrrb,Egfl6,Blnk,Arid5b,Pla2g1b,Wnt5a,Arpp21,Mobb,Zfp532,Spry4,Sox2,Etv4,Ryr2,Mras,C78283,C330004P14Rik,Nsg2,Btnl1,Odz4,Kcnu1,Tmem132d,Pabpc3,Grlh2,Prdm5,Mycn,Nrp2,Dlgap3,9130401L11Rik,Wscd1,Pipox,Upp1,D730003K21Rik,Da pp1,Liph,Onecut1,Fgf3,Elmo1,Pcaf,Cd37,Arc,Ddc,2310067E19Rik,Sall3,Zfp518,Klf4,Sfrp1,Zic3,En2,Ildr1,Epb4.114a,Mup4,Trps1,Rfx2,Foxp1,Kit,Polr3gl,Igf2bp2,Timp4,Gad1,Gm216,Slc39a14,Lax1,Stc2,Gjb4,Tmprss12,8430430B14Rik,Pla1a,Ttn,Cyp4f14,L1td1,4930449E01Rik,Slc27a2,Csrp2,Scarb2,Pecam1,Slc12a8,Rcc2,Epha4,Lifr,Tmeff1,Sirt1,Konq2,Tm7sf4,Mylpf,Zic5,Enah,A830025M08,Lap3,Elavl4,Galnt9,Nfib,Zfp296,Ddx58,Oas1g,Aspa,Crtac1,Enpp3,St8sia6,Ptgs1,Ifitm1,Rarg,Ly75,Dock2,Meis2,Tmem2,Gna14,Gpr133,Tcf15,Rcor2,9330199F22Rik,Ccno,Tdgl1,Gfpt2,Sox13,Jmjd1a,Apobec3,Acp6,Msrb2,Slc1a3,Atcay,Capsl,Cacybp,A530088H08Rik,Ifitm7,Sap30,Rbmxl2,Crm p1,Gadd45a,Elavl2,Terf1,Prdm14,Adamts1,Otx2,Eps8,Nanog,Pigl,Armcx1,Ret2,4930432N10Rik,Gsta3,Ptpn3,Etv5,E2f8,Smardc1,Al427809,Fgd4,Ccdc113,Phc1,Jag1,Lr rn2,Mreg,Lonrf2,Ccdc3,Tmc5,A730049H05Rik,Casq2,Prdm1,Itpk1,Jmjd2c,Mfng,Cdyl2,Zfp57,Vwf,Ifitm3,Cnga3,Zfp518b,Ttyh1,Tfdp2,Cd80,Gsta4,C330048F19,Etac1,A430 010J10Rik,Gdf3,Mitf,Xkr5,Snta1,Batf,Runx1t1,Fbxw10,Inoc1,Elf2,Tiam1,Angpt2,Sco1,Cep55,Oit1,Nolc1,Ssr2,0610039H22Rik,Pole4,Nmnat2,Arhgef3,Pgc,Coro2b,Akr1b8,Dnahc17,Rif1,Tera,Lgals12,Btdb11,Zscan10,Psat1,Acss1,Speer4b,Rmnd5b,Ptprk,Slc25a40,Rfc5,Slc37a1,Dppa5a,Eed,Cplx1,Mobkl2c,Evc,Ifitm2,Mtss1,Rax,Mtdh,Bai1,Pou 5f1,Rpp25,Zfp106,Tp73,Rpl38,Derl3,Triml2,Tcea3,Adora2b,Epas1,1700049E22Rik,Ubr5,Dil1,Mgmt,Ypel2,Twistnb,Rassf10,Myst4,Tor3a,Ctbp2,Nrsn1,Susd2,Ccne1,Ppp2r 2d,Spic,Cds1,Sgk1,Igf1,Slc35f4,Klf15,Cdc37l1,Lypla1,Dcbld1,Chchd6,Cenpm,Irak3,LOC380850,Gnppat1,Ppfbp2,Dbx1,H2afz,Msh6,Pex13,Tff3,Fnbp1,Chd9,Jarid2,Rfng,R sph1,Tbc1d9,Glt1d1,9430078K24Rik,Nlrc4,4921511C04Rik,Gm867,Gtsf11,Lama1,EG545253,Zfp59,EG626231,Ifitm6,Brunol4,Tcerg11,Islr2,Hist1h2ae,Trpm1,TeX14,Rhcg,Slc6a1,Ptger2,Bnc2,Kcnh8,Tdrd12,Ryr3,Akr1c21,Sox21,Aard,Rnf138,Robo4,Ankrd36,Dpy30,Wdr20b,Mup5,Akap11,Yes1,Txndc2,Fez1,Akr1c12,5033426E14Rik,Hist1h2bp,Tmem45a,Spag6,Dcl3,C230088H06Rik,Cdyl,Frrs1,Slco4c1,Gpr1,Plcb4,Aire,Lix1,1110058D11Rik,Gyk,Gm428,D330037F02Rik,Tfpi,LOC432535,Tom1,Cth,Cml4,Tasp1,Ct nnal1,Vps26a,Tcea1,Pzp,Igkv4-90,Scn3a,Tal1,Bdh2,Aldoart2,Tmem40,Abcb5,Frmd5,Gm805,Frmd4a,Stmn1,Tiparp,Cradd,Fancl,Igfbp1,Bcat1,Ldhal6b,Zcchc10,Aass,Rragb,Esco2,Efcab2,Rab27a,Wdr47,Xab1,Cd96,Hells,Lmo2,Clnk,2410114N07Rik,Ppef2,I110,Lbxcor1,Tek,Pcolce2,Stk10,Zic2,4930455B14Rik,Hlf,Tubb3,Nkx6-2,Gpx2,Hhip,Rgs16,Foxd1,Hey1,Mcam,</p> |
| Nanog | Knockdown | -1 | 258 | <p>Slc15a1,Inhbb,Mras,Notch4,Tcl1,Gad1,EG328314,Gsta3,Hck,Spp1,Oit1,Sfrp1,C330004M20Rik,Sema5b,Prmt8,Gli2,Lrrc34,Gjb4,Ttpa,Scgb1c1,Fzd5,Fbxw10,Spats1,Dlgap 3,Fut9,Erns,Spns3,Sh2d4b,C330048F19,Phf19,Nanog,8430430B14Rik,Cspg5,Kit,Pga5,Tubb2b,2310067E19Rik,Parvb,Hhip,Btnl1,Meox1,Cyb5r2,Irga9,Tnfrsf13c,Polr3gl,24 10152P15Rik,5830431A10Rik,Esrrb,Pax6,Zc3h12a,Scgb3a1,Blnk,Tm7sf4,Gjb5,Cpsf4,C330026N13Rik,Gm1967,Jak3,Alpk3,Camk2n1,Lag3,Nfib,Tha1,Gm1679,Pde9a,Ifit m1,C130034I18Rik,Ntn1,Zyg11a,Ildr1,Meox2,Pdyn,Prdm1,Klf4,Ablim2,Jakmip1,Mov10,Manba,Zmat4,Gem,Morc1,D1pas1,Igfsf21,Ncam1,Ggt1,Prdm14,Atp1b2,Gfod1,Nsg2, Chst8,Oas2,2210417A02Rik,Ddx58,Gpr133,Prkag1,Lrrn3,Zfp59,Zfp459,Fahd1,Bcl3,Ptgs1,Piwil4,Kcnj12,Smtnl2,Crtac1,Slc28a1,Trpm1,Fxyd6,Tcte1,Mitf,Mylpf,Apod,Itpk1, Niban,Ifitm7,Cxcr7,Trps1,Mobkl2c,Parp14,Cep55,Ccr7,Pdcl2,5830454E08Rik,Cdyl2,Ccna1,Lonrf2,Mical1,Lgals12,Zfp42,Sult6b1,Lima1,Tmem132d,Gjb3,Slc44a4,Tff3,Apob ec3,Slc37a1,Siglec5,Zbtb7c,Pabpc3,Cobl,Nanos3,Susd2,Gjc1,Fbxo36,Rage,Gcm2,Centa1,Jam2,Nkx6-3,Aqp3,Mme,Pgc,Abcg1,Etv4,Scd2,Gm216,Myst4,Socs3,Cenpm,Nf2,Vstm2l,Col13a1,Sorl1,Gna14,Rnf125,Egln3,Elf2,Calcb,Zfp273,2900041M22Rik,Krt42,Erc2,Inhha,Mapt, Tcfcp211,St8sia6,Epb4.114a,Aebp2,Hsd17b11,Acp5,Armc2,Spic,Slc7a3,Rpp25,Osm,Tmem136,Hsd17b14,Ankrd35,0610039H22Rik,Aym1,Erf,Acp6,Grik4,Rpl38,Gbx2,Dppa 3,Rab39,Hap1,Ttyh2,Fabp3,Gm1631,Cd37,Ifitm2,Igll1,Gabrp,Lrrc2,Stmn2,Dcl2,Ldhh,Nr5a2,Lrrn2,Triml2,Gfpt2,Ifitm6,Morc2b,Ankrd44,Sirt4,Isoc2a,Tgm1,Scd1,Grtp1,Tulp 2,Ddc,Rab27a,Cox7a1,Hsh2d,Hivep3,Krt17,Zfp819,Centb1,Tmem106a,Aph1a,Sept1,Tjp3,Sh3gl2,Pla2g4e,Myom2,Slc6a1,Ptger2,She,Pcdh21,2810011L19Rik,Serpinb6c,A k7,Slc1a1,ORF28,Slc5a1,Pcyt1b,Nhedc2,Atp2b2,Oas1g,Gprc5e,9530020007Rik,Kcnip2,Cpne5,Acaca,Calr3,</p>                                                                                                                                                                                                                                                                                                                                                                                                                                                                                                                                                                                                                                                                                                                                                                                                                                                                                                                                                                                                                                                                                                                                                                                                                                                                                                                                                                                                                                                                                                                                                                                                                                                                                                                     |

## References

- Bilodeau, S., Kagey, M.H., Frampton, G.M., Rahl, P.B., and Young, R.A. 2009. SetDB1 contributes to repression of genes encoding developmental regulators and maintenance of ES cell state. *Genes Dev* 23, 2484-2489.
- Cao, Y., Yao, Z., Sarkar, D., Lawrence, M., Sanchez, G.J., Parker, M.H., MacQuarrie, K.L., Davison, J., Morgan, M.T., Ruzzo, W.L., Gentleman, R.C., and Tapscott, S.J. 2010. Genome-wide MyoD binding in skeletal muscle cells: a potential for broad cellular reprogramming. *Dev Cell* 18, 662-674.
- Chen, X., Xu, H., Yuan, P., Fang, F., Huss, M., Vega, V.B., Wong, E., Orlov, Y.L., Zhang, W., Jiang, J., Loh, Y.H., Yeo, H.C., Yeo, Z.X., Narang, V., Govindarajan, K.R., Leong, B., Shahab, A., Ruan, Y., Bourque, G., Sung, W.K., Clarke, N.D., Wei, C.L., and Ng, H.H. 2008. Integration of external signaling pathways with the core transcriptional network in embryonic stem cells. *Cell* 133, 1106-1117.
- Creyghton, M.P., Cheng, A.W., Welstead, G.G., Kooistra, T., Carey, B.W., Steine, E.J., Hanna, J., Lodato, M.A., Frampton, G.M., Sharp, P.A., Boyer, L.A., Young, R.A., and Jaenisch, R. 2010. Histone H3K27ac separates active from poised enhancers and predicts developmental state. *Proc Natl Acad Sci U S A* 107, 21931-21936.
- Handoko, L., Xu, H., Li, G., Ngan, C.Y., Chew, E., Schnapp, M., Lee, C.W., Ye, C., Ping, J.L., Mulawadi, F., Wong, E., Sheng, J., Zhang, Y., Poh, T., Chan, C.S., Kunarso, G., Shahab, A., Bourque, G., Cacheux-Rataboul, V., Sung, W.K., Ruan, Y., and Wei, C.L. 2011. CTCF-mediated functional chromatin interactome in pluripotent cells. *Nat Genet* 43, 630-638.
- Hezroni, H., Sailaja, B.S., and Meshorer, E. 2011. Pluripotency-related, valproic acid (VPA)-induced genome-wide histone H3 lysine 9 (H3K9) acetylation patterns in embryonic stem cells. *J Biol Chem* 286, 35977-35988.
- Ho, L., Miller, E.L., Ronan, J.L., Ho, W.Q., Jothi, R., and Crabtree, G.R. 2011. esBAF facilitates pluripotency by conditioning the genome for LIF/STAT3 signalling and by regulating polycomb function. *Nat Cell Biol* 13, 903-913.
- Kagey, M.H., Newman, J.J., Bilodeau, S., Zhan, Y., Orlando, D.A., van Berkum, N.L., Ebmeier, C.C., Goossens, J., Rahl, P.B., Levine, S.S., Taatjes, D.J., Dekker, J., and Young, R.A. 2010. Mediator and cohesin connect gene expression and chromatin architecture. *Nature* 467, 430-435.
- Kim, Y., Sharov, A.A., McDole, K., Cheng, M., Hao, H., Fan, C.M., Gaiano, N., Ko, M.S., and Zheng, Y. 2011. Mouse B-type lamins are required for proper organogenesis but not by embryonic stem cells. *Science* 334, 1706-1710.
- Ku, M., Koche, R.P., Rheinbay, E., Mendenhall, E.M., Endoh, M., Mikkelsen, T.S., Presser, A., Nusbaum, C., Xie, X., Chi, A.S., Adli, M., Kasif, S., Ptaszek, L.M., Cowan, C.A., Lander, E.S., Koseki, H., and Bernstein, B.E. 2008. Genomewide analysis of PRC1 and PRC2 occupancy identifies two classes of bivalent domains. *PLoS Genet* 4, e1000242.
- Lefterova, M.I., Steger, D.J., Zhuo, D., Qatanani, M., Mullican, S.E., Tuteja, G., Manduchi, E., Grant, G.R., and Lazar, M.A. 2010. Cell-specific determinants of peroxisome proliferator-activated receptor gamma function in adipocytes and macrophages. *Mol Cell Biol* 30, 2078-2089.
- Li, G., Margueron, R., Ku, M., Chambon, P., Bernstein, B.E., and Reinberg, D. 2010. Jarid2 and PRC2, partners in regulating gene expression. *Genes Dev* 24, 368-380.
- Marks, H., Chow, J.C., Denissov, S., Francoijs, K.J., Brockdorff, N., Heard, E., and Stunnenberg, H.G. 2009. High-resolution analysis of epigenetic changes associated with X inactivation. *Genome Res* 19, 1361-1373.

Marson, A., Levine, S.S., Cole, M.F., Frampton, G.M., Brambrink, T., Johnstone, S., Guenther, M.G., Johnston, W.K., Wernig, M., Newman, J., Calabrese, J.M., Dennis, L.M., Volkert, T.L., Gupta, S., Love, J., Hannett, N., Sharp, P.A., Bartel, D.P., Jaenisch, R., and Young, R.A. 2008. Connecting microRNA genes to the core transcriptional regulatory circuitry of embryonic stem cells. *Cell* 134, 521-533.

Meissner, A., Mikkelsen, T.S., Gu, H., Wernig, M., Hanna, J., Sivachenko, A., Zhang, X., Bernstein, B.E., Nusbaum, C., Jaffe, D.B., Gnirke, A., Jaenisch, R., and Lander, E.S. 2008. Genome-scale DNA methylation maps of pluripotent and differentiated cells. *Nature* 454, 766-770.

Mikkelsen, T.S., Ku, M., Jaffe, D.B., Issac, B., Lieberman, E., Giannoukos, G., Alvarez, P., Brockman, W., Kim, T.K., Koche, R.P., Lee, W., Mendenhall, E., O'Donovan, A., Presser, A., Russ, C., Xie, X., Meissner, A., Wernig, M., Jaenisch, R., Nusbaum, C., Lander, E.S., and Bernstein, B.E. 2007. Genome-wide maps of chromatin state in pluripotent and lineage-committed cells. *Nature* 448, 553-560.

Nishiyama, A., Xin, L., Sharov, A.A., Thomas, M., Mowrer, G., Meyers, E., Piao, Y., Mehta, S., Yee, S., Nakatake, Y., Stagg, C., Sharova, L., Correa-Cerro, L.S., Basse, U., Hoang, H., Kim, E., Tapnio, R., Qian, Y., Dudekula, D., Zalzman, M., Li, M., Falco, G., Yang, H., Lee, S., Monti, M., Stanghellini, I., Islam, M.N., Nagaraja, R., Goldberg, I., Wang, W., Longo, D.L., Schlessinger, D., and Ko, M.S.H. 2009. Uncovering early response of gene regulatory networks in ES cells by systematic induction of transcription factors. *Cell Stem Cells*.

Nitzsche, A., Paszkowski-Rogacz, M., Matarese, F., Janssen-Megens, E.M., Hubner, N.C., Schulz, H., de Vries, I., Ding, L., Huebner, N., Mann, M., Stunnenberg, H.G., and Buchholz, F. 2011. RAD21 cooperates with pluripotency transcription factors in the maintenance of embryonic stem cell identity. *PLoS One* 6, e19470.

Schnetz, M.P., Handoko, L., Akhtar-Zaidi, B., Bartels, C.F., Pereira, C.F., Fisher, A.G., Adams, D.J., Flicek, P., Crawford, G.E., Laframboise, T., Tesar, P., Wei, C.L., and Scacheri, P.C. 2010. CHD7 targets active gene enhancer elements to modulate ES cell-specific gene expression. *PLoS Genet* 6, e1001023.

Yildirim, O., Li, R., Hung, J.H., Chen, P.B., Dong, X., Ee, L.S., Weng, Z., Rando, O.J., and Fazio, T.G. 2011. Mbd3/NURD Complex Regulates Expression of 5-Hydroxymethylcytosine Marked Genes in Embryonic Stem Cells. *Cell* 147, 1498-1510.

Young, M.D., Willson, T.A., Wakefield, M.J., Trounson, E., Hilton, D.J., Blewitt, M.E., Oshlack, A., and Majewski, I.J. 2011. ChIP-seq analysis reveals distinct H3K27me3 profiles that correlate with transcriptional activity. *Nucleic Acids Res* 39, 7415-7427.

Yuan, P., Han, J., Guo, G., Orlov, Y.L., Huss, M., Loh, Y.H., Yaw, L.P., Robson, P., Lim, B., and Ng, H.H. 2009. Eset partners with Oct4 to restrict extraembryonic trophoblast lineage potential in embryonic stem cells. *Genes Dev* 23, 2507-2520.
